# Supplementary material
Source: publisher figshare collection journal article supplement (https://acs.figshare.com/ndownloader/files/6413937)
Supplement: Supplementary file 1 [file 6413937]

# Discovery of Selective Inhibitors Targeting Acetylcholinesterase 1 from Disease-Transmitting Mosquitoes

*Cecilia Engdahl,<sup>†,§</sup> Sofie Knutsson,<sup>†,§</sup> Fredrik Ekström,<sup>‡,\*</sup> and Anna Linusson<sup>†,\*</sup>*

<sup>†</sup>Department of Chemistry, Umeå University, SE-901 87 Umeå, Sweden

<sup>‡</sup>Swedish Defense Research Agency, CBRN Defense and Security, SE-906 21 Umeå, Sweden

\*Corresponding author

<sup>§</sup>These authors contributed equally

E-mail address: anna.linusson@umu.se; fredrik.ekstrom@foi.se

## Table of contents

|                                                                                  |    |
|----------------------------------------------------------------------------------|----|
| Inhibition data from the HTS campaigns against AgAChE1, AaAChE1, and hAChE ..... | 3  |
| Statistics of HTS results .....                                                  | 5  |
| Reference compounds .....                                                        | 6  |
| Reference plate statistics .....                                                 | 6  |
| Z'-factors .....                                                                 | 7  |
| Examples of raw measurements of reference compounds .....                        | 8  |
| Reference plate - Estimation of false positives and false negatives.....         | 12 |
| Overview of the PCA models describing the AChE1 hits .....                       | 13 |
| Chemical space of AChE1 hits.....                                                | 15 |
| Selection of compounds for IC <sub>50</sub> determination.....                   | 17 |
| Complete inhibition results for all the re-tested compounds.....                 | 25 |
| Dose-response analyses for IC <sub>50</sub> determinations.....                  | 28 |
| NMR spectrum of compounds 3-10. ....                                             | 32 |
| <sup>1</sup> H and <sup>13</sup> C NMR spectrum of synthesized compounds .....   | 36 |
| Multiple sequence alignment AgAChE1 .....                                        | 42 |

## SUPPORTING INFORMATION

|                                                                                                          |    |
|----------------------------------------------------------------------------------------------------------|----|
| Multiple sequence alignment <i>AaAChE1</i> .....                                                         | 43 |
| Selection of template for homology modeling .....                                                        | 44 |
| Angles of Tyr337 in homology models of <i>AgAChE1</i> and <i>AaAChE1</i> .....                           | 45 |
| Evaluation of <i>AgAChE1</i> and <i>AaAChE1</i> homology models .....                                    | 45 |
| Compounds <b>1</b> and <b>2</b> modelled into the active site of <i>AgAChE1</i> and <i>AaAChE1</i> ..... | 46 |
| Data collection and refinement statistics for 5FUM .....                                                 | 48 |
| References .....                                                                                         | 49 |

## SUPPORTING INFORMATION

Inhibition data from the HTS campaigns against AgAChE1, AaAChE1, and hAChE

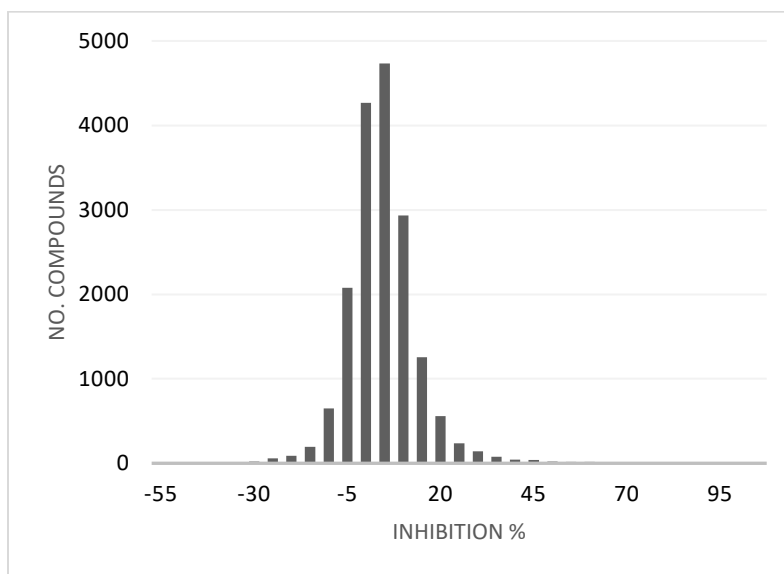

**Figure S1.** Histogram showing the distribution of the HTS inhibition data for AgAChE1 used in the differential HTS study.

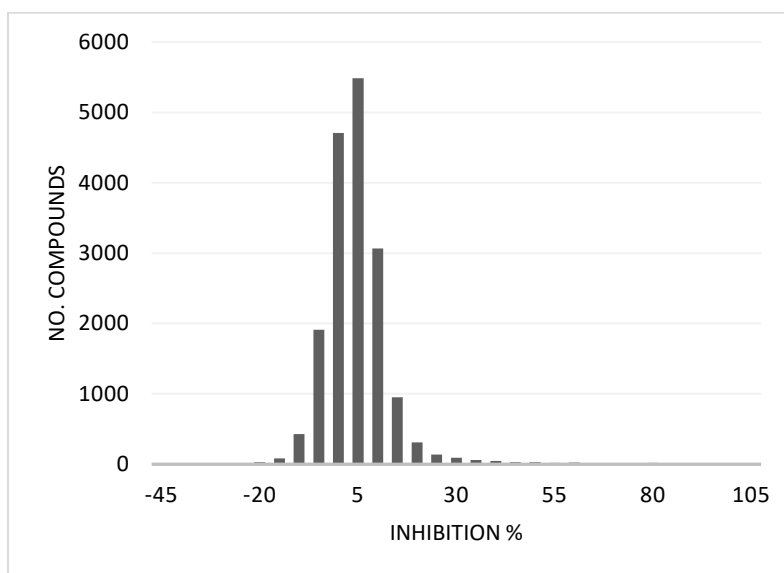

**Figure S2.** Histogram showing the distribution of the HTS inhibition data for AaAChE1 used in the differential HTS study.

## SUPPORTING INFORMATION

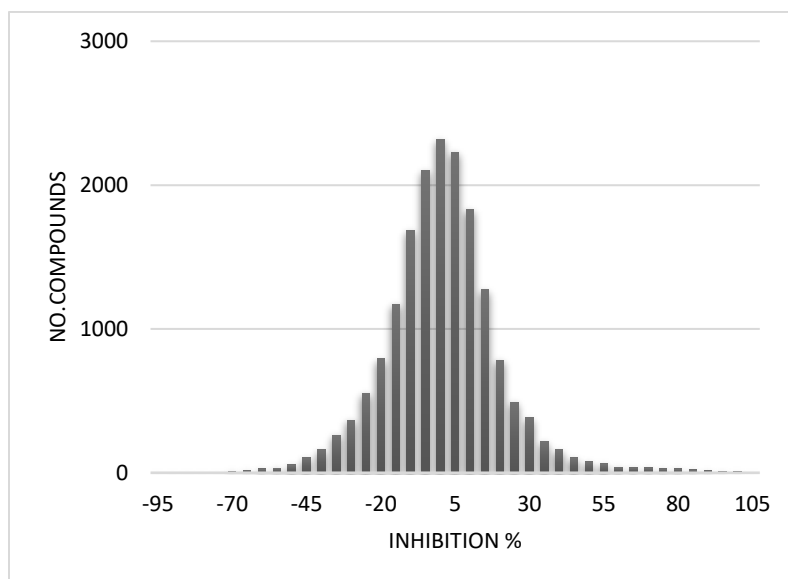

**Figure S3.** Histogram showing the distribution of the HTS inhibition data for *hAChE* used in the differential HTS study.<sup>1</sup>

## SUPPORTING INFORMATION

### Statistics of HTS results

Data was normalized as % of control according to the following equation:

$$\frac{x_i}{\bar{c}_+} \times 100$$

Where

$x_i$  raw measurement

$\bar{c}_+$  mean of eight positive controls within plate (maximum activity)

**Table S1.** AChE1 HTS statistics based on the screened compounds' inhibition of activity in relation to positive controls.

|                                                                   | <i>AgAChE1</i> | <i>AaAChE1</i> |
|-------------------------------------------------------------------|----------------|----------------|
| <b>Mean (%)</b>                                                   | 3              | 3              |
| <b>Median (%)</b>                                                 | 2              | 2              |
| <b>Standard deviation (%)</b>                                     | 10             | 9              |
| <b>Cut-off (%)</b>                                                | 33             | 31             |
| <b>No. of hits</b>                                                | 235            | 286            |
| <b>Hit-rate (%)</b>                                               | 1.3            | 1.6            |
| <b>No. of unique hits of <i>AgAChE1</i> and/or <i>AaAChE1</i></b> | <b>338</b>     |                |

## SUPPORTING INFORMATION

### Reference compounds

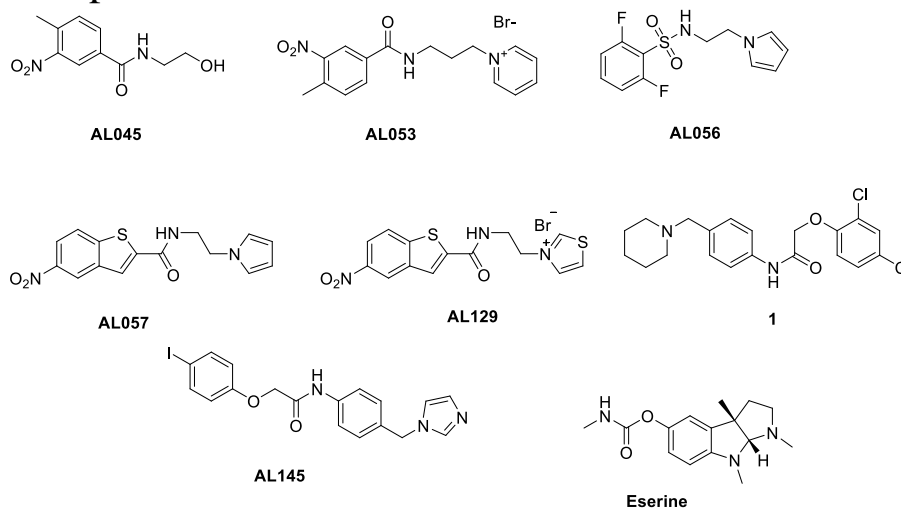

**Figure S4.** Chemical structures of compounds on reference plate. At 50  $\mu\text{M}$ , these compounds exhibited mean inhibition values ranging from 0-95% for both enzymes, and all but one compound had a standard deviation of 3-8%. The higher standard deviation of the mean observed for compound **1** (17-18%) was probably due to a handling error whereby no compound was added to in total six and three wells of the AgAChE1 and AaAChE1 experiments, respectively.

### Reference plate statistics

**Table S2.** Reference plate statistics.

|                                |                      | AL045 | AL053 | AL056 | AL057 | AL129 | 1    | AL145 | Eserine |
|--------------------------------|----------------------|-------|-------|-------|-------|-------|------|-------|---------|
| <b>IC<sub>50</sub></b>         | AgAChE1              | 1000  | 62    | 1000  | 1000  | 46    | 0.26 | 100   | 0.005   |
|                                | AaAChE1              | 1000  | 38    | 1000  | 1000  | 37    | 0.44 | 100   | 0.007   |
| <b>mean (%)</b>                | AgAChE1 <sup>a</sup> | 2     | 18    | 0     | -3    | 25    | 90   | 7     | 95      |
|                                | AaAChE1 <sup>b</sup> | 1     | 26    | 0     | -3    | 24    | 89   | 11    | 94      |
| <b>median (%)</b>              | AgAChE1 <sup>a</sup> | 2     | 19    | 0     | -4    | 25    | 93   | 8     | 96      |
|                                | AaAChE1 <sup>b</sup> | 1     | 26    | 0     | -4    | 24    | 92   | 10    | 94      |
| <b>SD</b>                      | AgAChE1 <sup>a</sup> | 7     | 7     | 8     | 7     | 8     | 18   | 8     | 8       |
|                                | AaAChE1 <sup>b</sup> | 5     | 6     | 6     | 7     | 7     | 17   | 7     | 3       |
| <b>total no. of replicates</b> | AgAChE1 <sup>a</sup> | 216   | 216   | 216   | 216   | 216   | 216  | 216   | 216     |
|                                | AaAChE1 <sup>b</sup> | 96    | 96    | 96    | 96    | 96    | 96   | 96    | 96      |
| <b>no. scored as hits</b>      | AgAChE1 <sup>a</sup> | 0     | 7     | 1     | 0     | 19    | 210  | 0     | 215     |
|                                | AaAChE1 <sup>b</sup> | 0     | 14    | 0     | 0     | 9     | 93   | 0     | 96      |
| <b>no. scored as inactive</b>  | AgAChE1 <sup>a</sup> | 216   | 209   | 215   | 216   | 197   | 6    | 216   | 1       |
|                                | AaAChE1 <sup>b</sup> | 96    | 82    | 96    | 96    | 87    | 3    | 96    | 0       |

<sup>a</sup>Based on % inhibition from 27 plates with eight replicates/plate <sup>b</sup>based on % inhibition from 12 plates with eight replicates/plate

## SUPPORTING INFORMATION

### Z'-factors

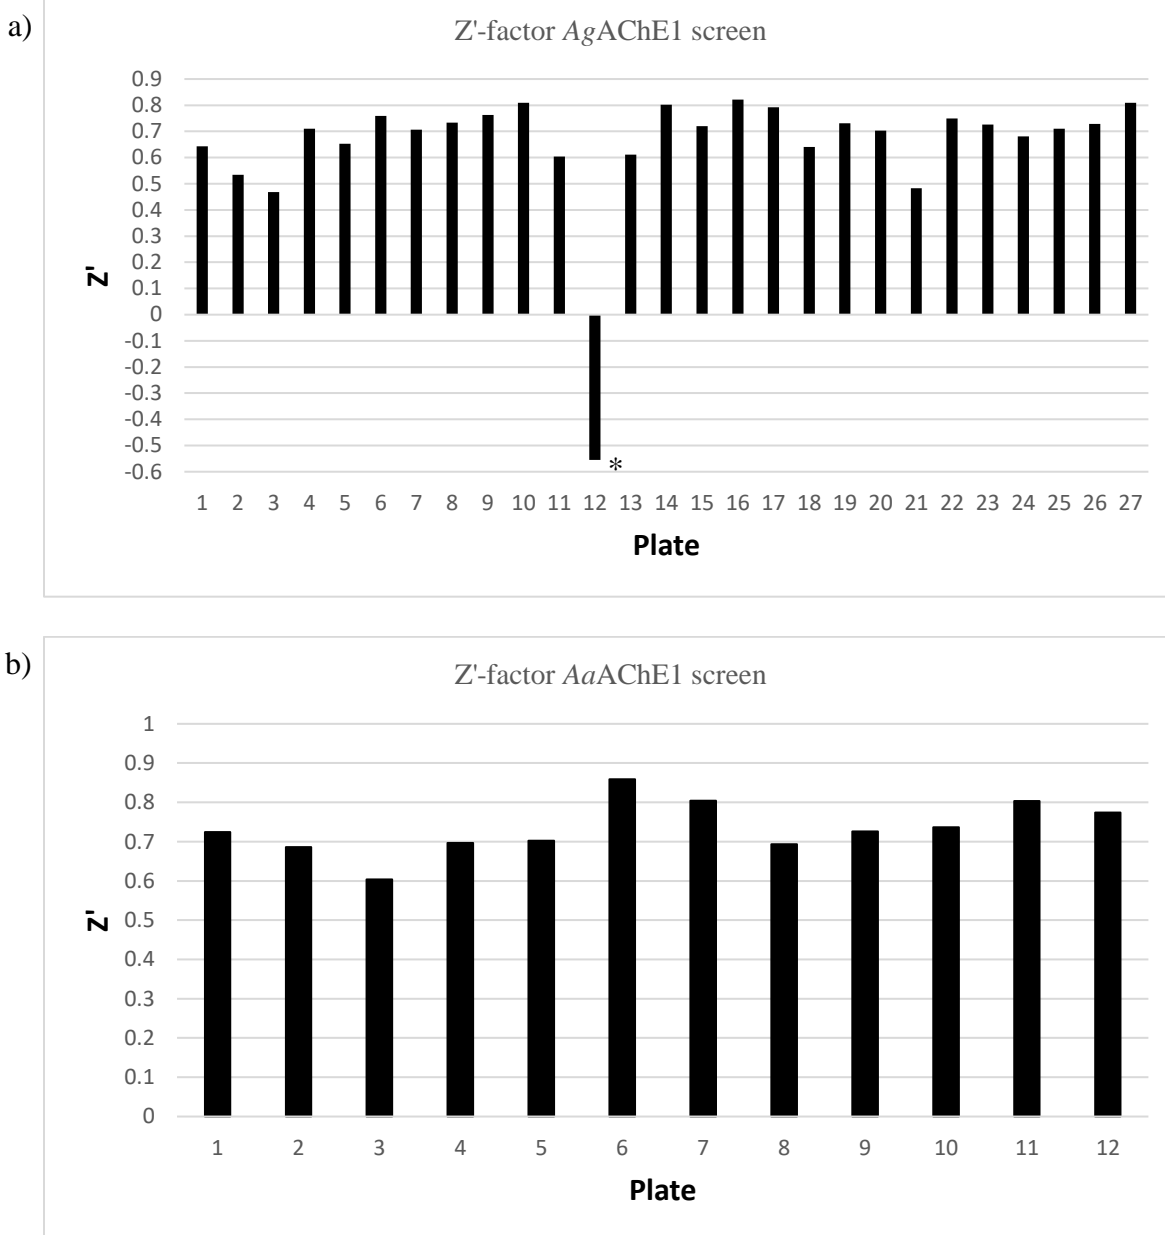

**Figure S5.** Z'-factors based on eserine and AL045 for each of the reference plate run during the screens against *AgAChE1* (a) and *AaAChE1* (b). \*The negative Z'-factor for this plate was due to one measurement for eserine being an extreme outlier, probably due to a handling error whereby no compound was added to the well (see Figure S5c). Excluding this one measurement resulted in Z'-factor of 0.64 for this plate.

## SUPPORTING INFORMATION

### Examples of raw measurements of reference compounds

a)

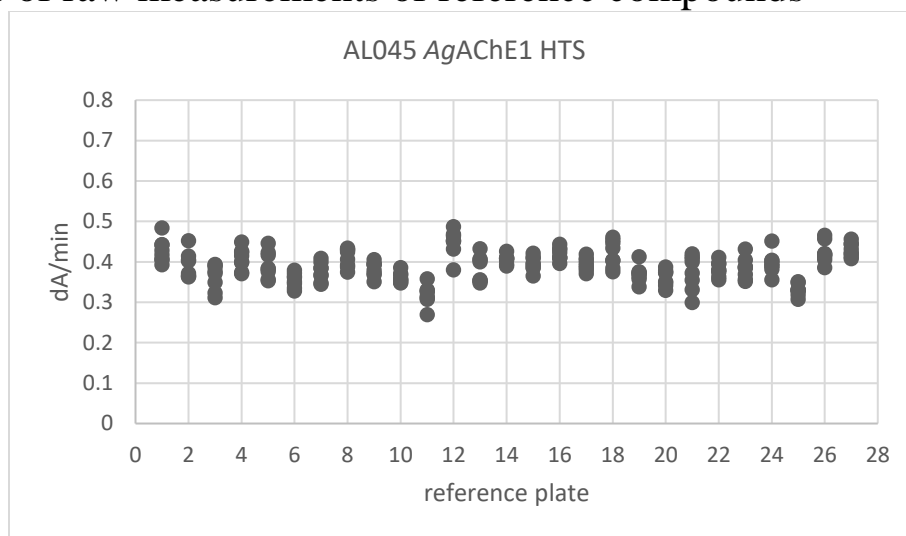

b)

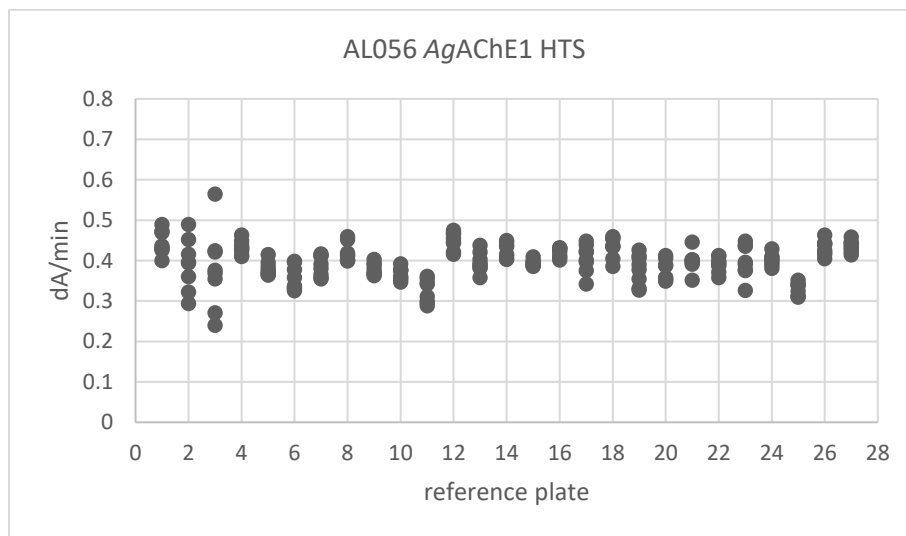

c)

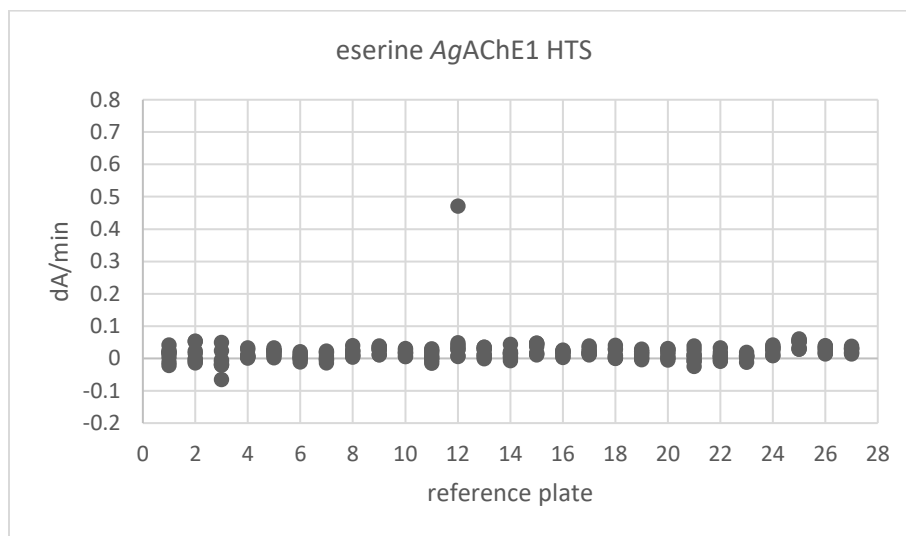



## SUPPORTING INFORMATION

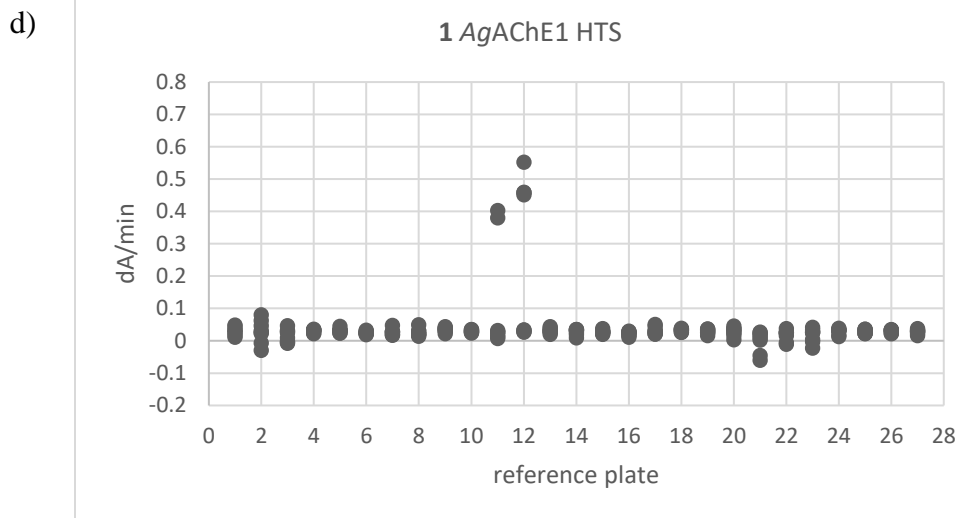

**Figure S6.** Examples of the change in absorbance over time (dA/min) of four compounds from the reference plate run 27 times during the AgAChE1 screen. Each compound was present in eight replicates on the reference plate. a) Positive control AL045 used for determination of Z'-factor. b) Positive control AL056. C) Negative control eserine used for determination of Z'-factor, one visible outliers (plate 12; dA/min > 0.45) probably due to a handling error whereby no compound was added to that well. d) Negative control **1**, six visible outliers (plate 9 and 12; dA/min > 0.35) probably due to a handling error whereby no compound was added to those wells.

## SUPPORTING INFORMATION

a)

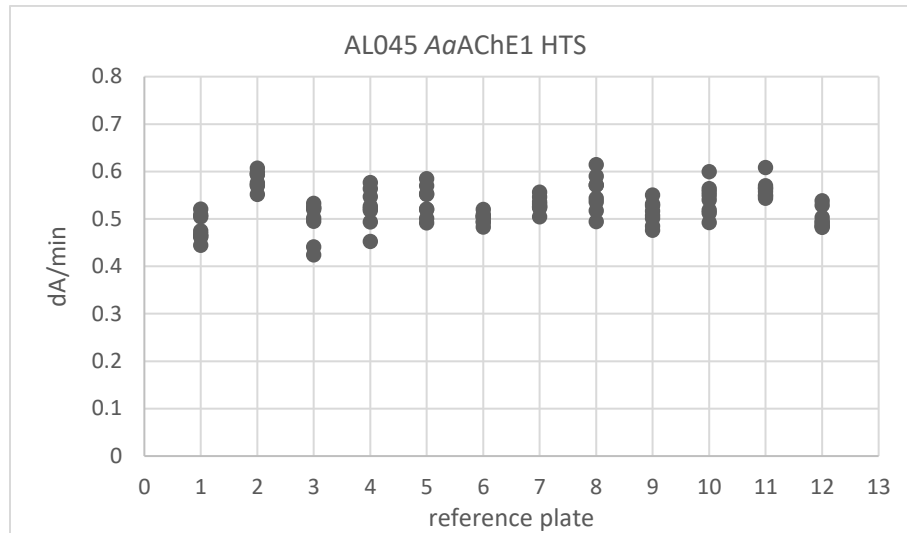

b)

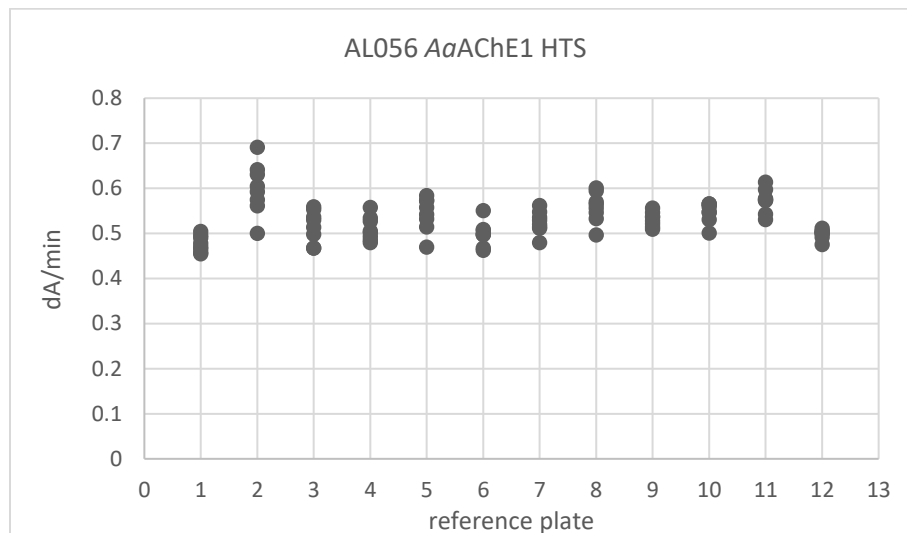

c)

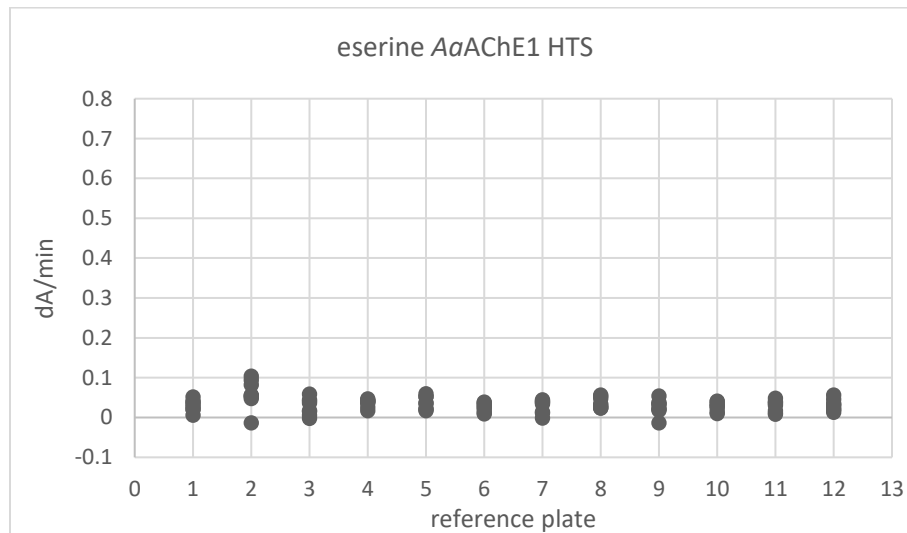

## SUPPORTING INFORMATION

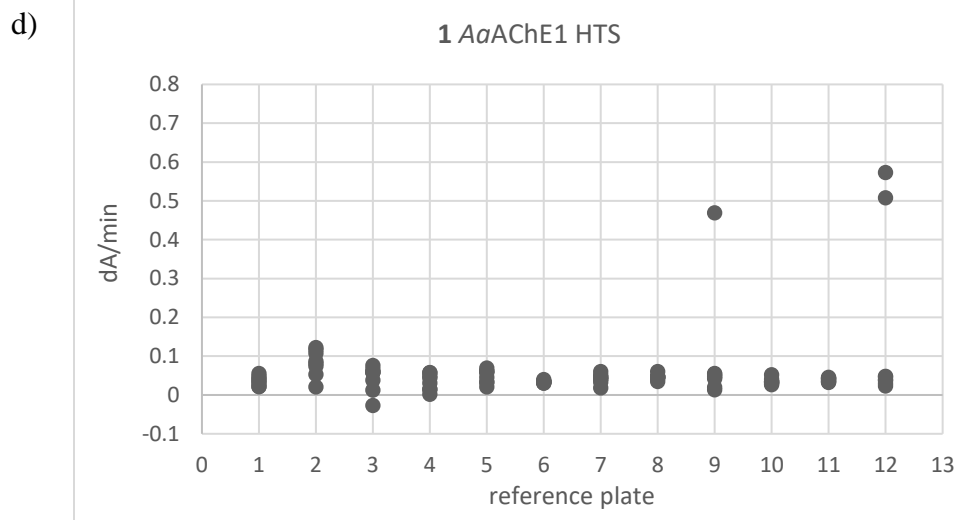

**Figure S7.** Examples of the change in absorbance over time (dA/min) of four compounds from the reference plate run 12 times during the AaAChE1 screen. Each compound was present in eight replicates on the reference plate. a) Positive control AL045 used for determination of Z'-factor. b) Positive control AL056. C) Negative control eserine used for determination of Z'-factor. d) Negative control **1**, three visible outliers (plate 9 and 12; dA/min > 0.45) probably due to no compound being added to those wells.

## Reference plate - Estimation of false positives and false negatives

**Table S3.** Estimation of false positives and false negatives based on reference plate data for the eight compounds loaded on the reference plate (Figure S3 and Table S2).

|                                          | <b>AgAChE1</b> | <b>AaAChE1</b> |
|------------------------------------------|----------------|----------------|
| No. false positives (wells) <sup>a</sup> | 27 (6%)        | 23 (11%)       |
| No. true positives (wells)               | 425            | 189            |
| No. false negatives (wells) <sup>b</sup> | 7 (0.5%)       | 3 (0.5%)       |
| No. true negatives (wells)               | 1269           | 553            |

<sup>a</sup>Definition of false positive: a measurement (well) for which reference compound  $r_i$  exhibited % inhibition  $\geq$  hit cut-off; where  $\bar{r}_i <$  hit cut-off. <sup>b</sup>Definition of false negative: a measurement (well) for which reference compound  $r_i$  exhibited % inhibition  $\leq$  hit cut-off; where  $\bar{r}_i >$  hit cut-off.

## Overview of the PCA models describing the AChE1 hits

**Table S4.** Model statistics of principal component analysis (PCA) used to describe and visualize the chemical diversity of the AChE1 hits and selection of compounds for IC<sub>50</sub> determinations. PCA is an unsupervised regression method used here to extract the main variation in the 2D-descriptor data (i.e. principal components). The PCA models were calculated on mean-centered data scaled to unit variance using software SIMCA-P+<sup>2</sup> and the number of significant components for each model were determined using scree-plots.

|   | Model                                         | No of hits | No of descriptors | No of components | Eigenvalue of last component | R <sup>2</sup> X (cum) | Q <sup>2</sup> X (cum) |
|---|-----------------------------------------------|------------|-------------------|------------------|------------------------------|------------------------|------------------------|
| 1 | all AChE1 hits                                | 338        | 73                | 4                | 3.72                         | 0.85                   | 0.82                   |
| 2 | hits ≥ 70% inhibition                         | 55         | 73                | 4                | 3.42                         | 0.83                   | 0.74                   |
| 3 | hits 69-31% inhibition                        | 248        | 73                | 4                | 3.61                         | 0.86                   | 0.83                   |
| 4 | hits ≥ 30% difference between Aα- and AgAChE1 | 35         | 73                | 3                | 3.88                         | 0.84                   | 0.78                   |
| 5 | hit sets A and B                              | 47         | 73                | 3                | 7                            | 0.83                   | 0.74                   |

## SUPPORTING INFORMATION

**Table S5.** Physicochemical descriptors used to describe the chemical space spanned by the AChE1 hits. The 2D-descriptors were calculated using MOE<sup>3</sup> on structures prepared as described in the Experimental section.

| No. | Descriptor      | No. | Descriptor            | No. | Descriptor           |
|-----|-----------------|-----|-----------------------|-----|----------------------|
| 1   | <b>apol</b>     | 26  | <b>chi0_C</b>         | 51  | <b>PEOE_VSA_NEG</b>  |
| 2   | <b>a_acc</b>    | 27  | <b>chi1</b>           | 52  | <b>PEOE_VSA_PNEG</b> |
| 3   | <b>a_aro</b>    | 28  | <b>chi1v</b>          | 53  | <b>PEOE_VSA_POL</b>  |
| 4   | <b>a_count</b>  | 29  | <b>chi1v_C</b>        | 54  | <b>PEOE_VSA_POS</b>  |
| 5   | <b>a_donacc</b> | 30  | <b>chi1_C</b>         | 55  | <b>PEOE_VSA_PPOS</b> |
| 6   | <b>a_heavy</b>  | 31  | <b>density</b>        | 56  | <b>radius</b>        |
| 7   | <b>a_hyd</b>    | 32  | <b>diameter</b>       | 57  | <b>rings</b>         |
| 8   | <b>a_IC</b>     | 33  | <b>Kier1</b>          | 58  | <b>SlogP</b>         |
| 9   | <b>a_ICM</b>    | 34  | <b>Kier2</b>          | 59  | <b>SMR</b>           |
| 10  | <b>a_nC</b>     | 35  | <b>Kier3</b>          | 60  | <b>TPSA</b>          |
| 11  | <b>a_nH</b>     | 36  | <b>KierA1</b>         | 61  | <b>VAdjEq</b>        |
| 12  | <b>a_nO</b>     | 37  | <b>KierA2</b>         | 62  | <b>VAdjMa</b>        |
| 13  | <b>balabanJ</b> | 38  | <b>KierA3</b>         | 63  | <b>VDistEq</b>       |
| 14  | <b>bpol</b>     | 39  | <b>KierFlex</b>       | 64  | <b>VDistMa</b>       |
| 15  | <b>b_1rotN</b>  | 40  | <b>logS</b>           | 65  | <b>vdw_area</b>      |
| 16  | <b>b_1rotR</b>  | 41  | <b>PEOE_PC+</b>       | 66  | <b>vdw_vol</b>       |
| 17  | <b>b_ar</b>     | 42  | <b>PEOE_PC-</b>       | 67  | <b>vsa_hyd</b>       |
| 18  | <b>b_count</b>  | 43  | <b>PEOE_RPC-</b>      | 68  | <b>vsa_other</b>     |
| 19  | <b>b_heavy</b>  | 44  | <b>PEOE_VSA_FHYD</b>  | 69  | <b>vsa_pol</b>       |
| 20  | <b>b_rotN</b>   | 45  | <b>PEOE_VSA_FNEG</b>  | 70  | <b>Weight</b>        |
| 21  | <b>b_rotR</b>   | 46  | <b>PEOE_VSA_FPNEG</b> | 71  | <b>weinerPath</b>    |
| 22  | <b>b_single</b> | 47  | <b>PEOE_VSA_FPOL</b>  | 72  | <b>weinerPol</b>     |
| 23  | <b>chi0</b>     | 48  | <b>PEOE_VSA_FPOS</b>  | 73  | <b>zagreb</b>        |
| 24  | <b>chi0v</b>    | 49  | <b>PEOE_VSA_FPPOS</b> |     |                      |
| 25  | <b>chi0v_C</b>  | 50  | <b>PEOE_VSA_HYD</b>   |     |                      |

## Chemical space of AChE1 hits

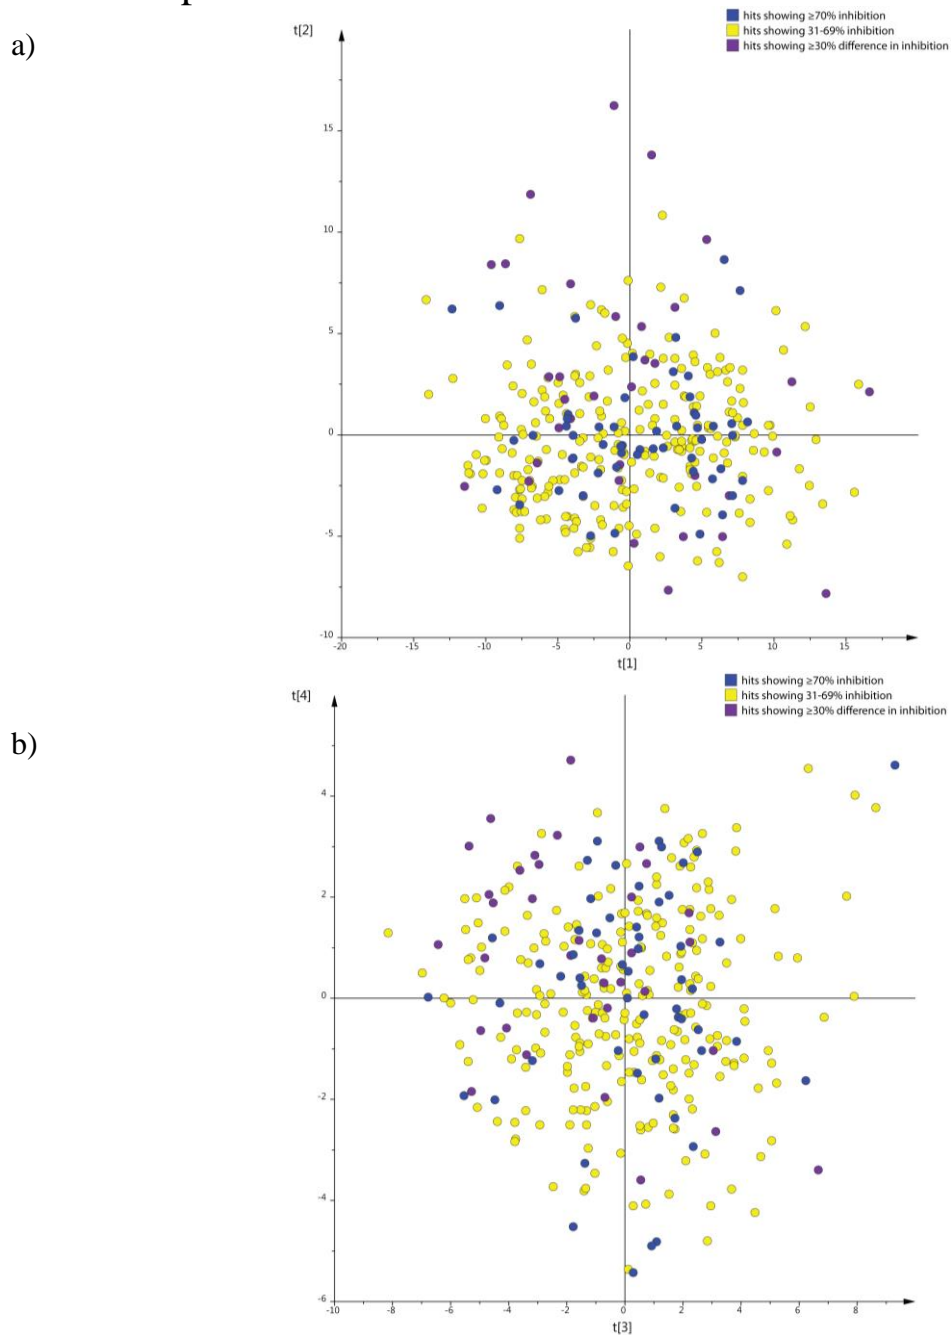

**Figure S8.** Chemical space of AChE1 hits. Score plots from PCA of the physicochemical properties of the identified hits colored according to their inhibition in the HTS. Hits with  $\geq 70\%$  inhibition in blue, 31-69% inhibition in yellow, and hits with  $\geq 30\%$  difference inhibition between Aa- and AgAChE1 in purple. The first and second components describe the size and hydrophobicity of the hits (a) and the third and fourth components show diversity relating to flexibility and charge (b).

# SUPPORTING INFORMATION

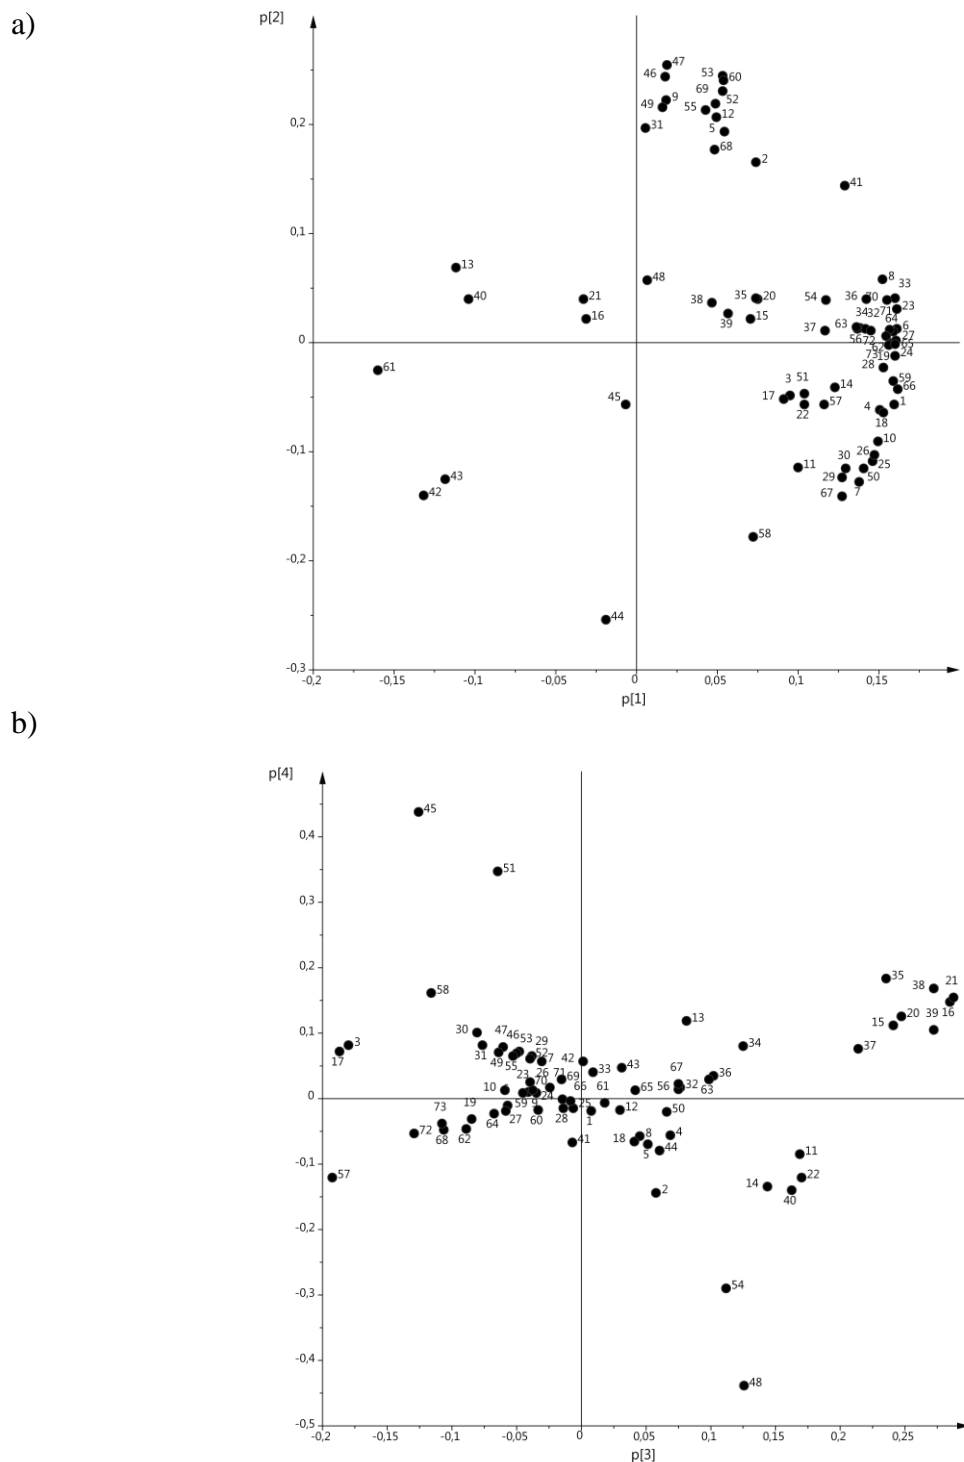

**Figure S9.** Chemical space of AChE1 hits. PCA loading plots of (a) p1 versus p2 and (b) p3 versus p4. The physicochemical descriptors included in the model are labeled with the numbers assigned in Table S5.



Selection of compounds for IC<sub>50</sub> determination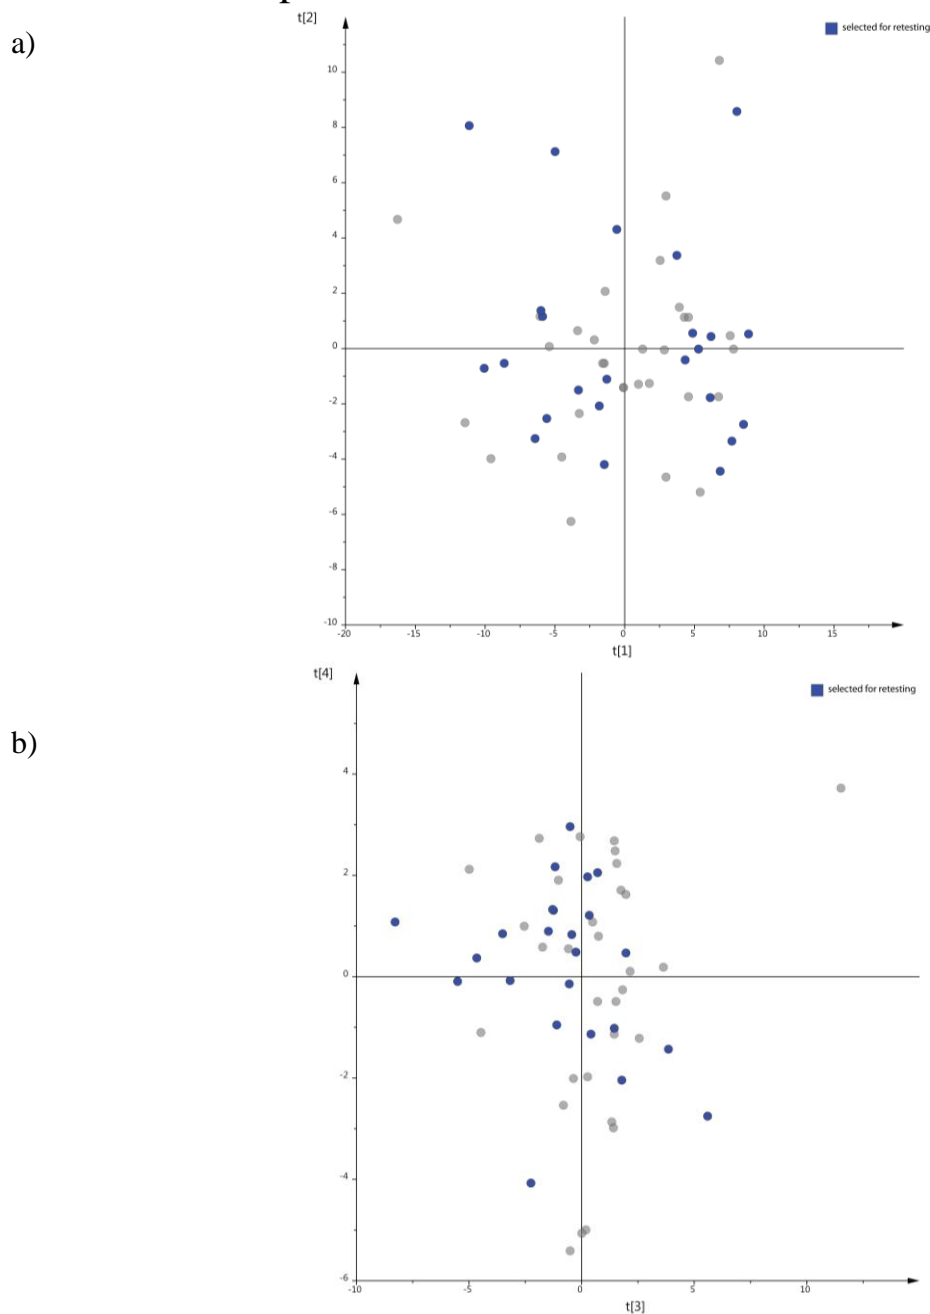

**Figure S10.** Chemical space of AChE1 hits showing  $\geq 70\%$  inhibition. Score plots from PCA of the physicochemical properties of the 55 hits showing at least 70% inhibition in the HTS, hits manually selected for IC<sub>50</sub> determination colored in blue (set A). The first and second components describe the size and hydrophobicity of the hits (a) and the third and fourth components show diversity relating to flexibility and charge (b).

# SUPPORTING INFORMATION

a)

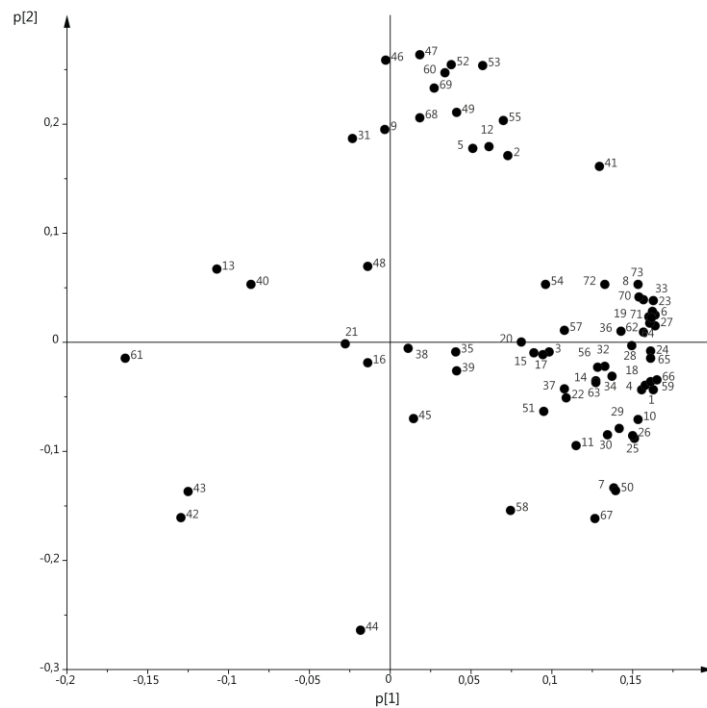

b)

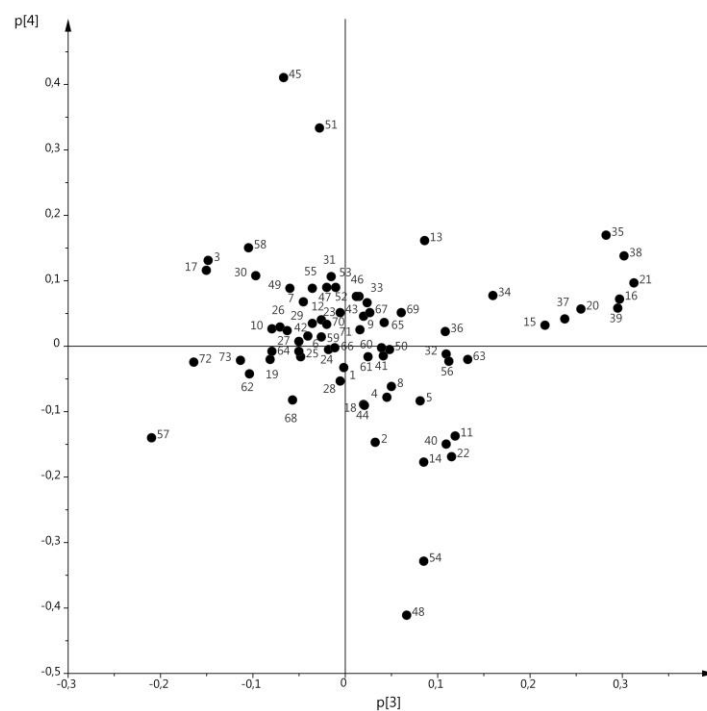

**Figure S11.** Chemical space of AChE1 hits showing  $\geq 70\%$  inhibition. PCA loading plots of (a) p1 versus p2 and (b) p3 versus p4. The physicochemical descriptors included in the model are labeled with the numbers assigned in Table S5.

## SUPPORTING INFORMATION

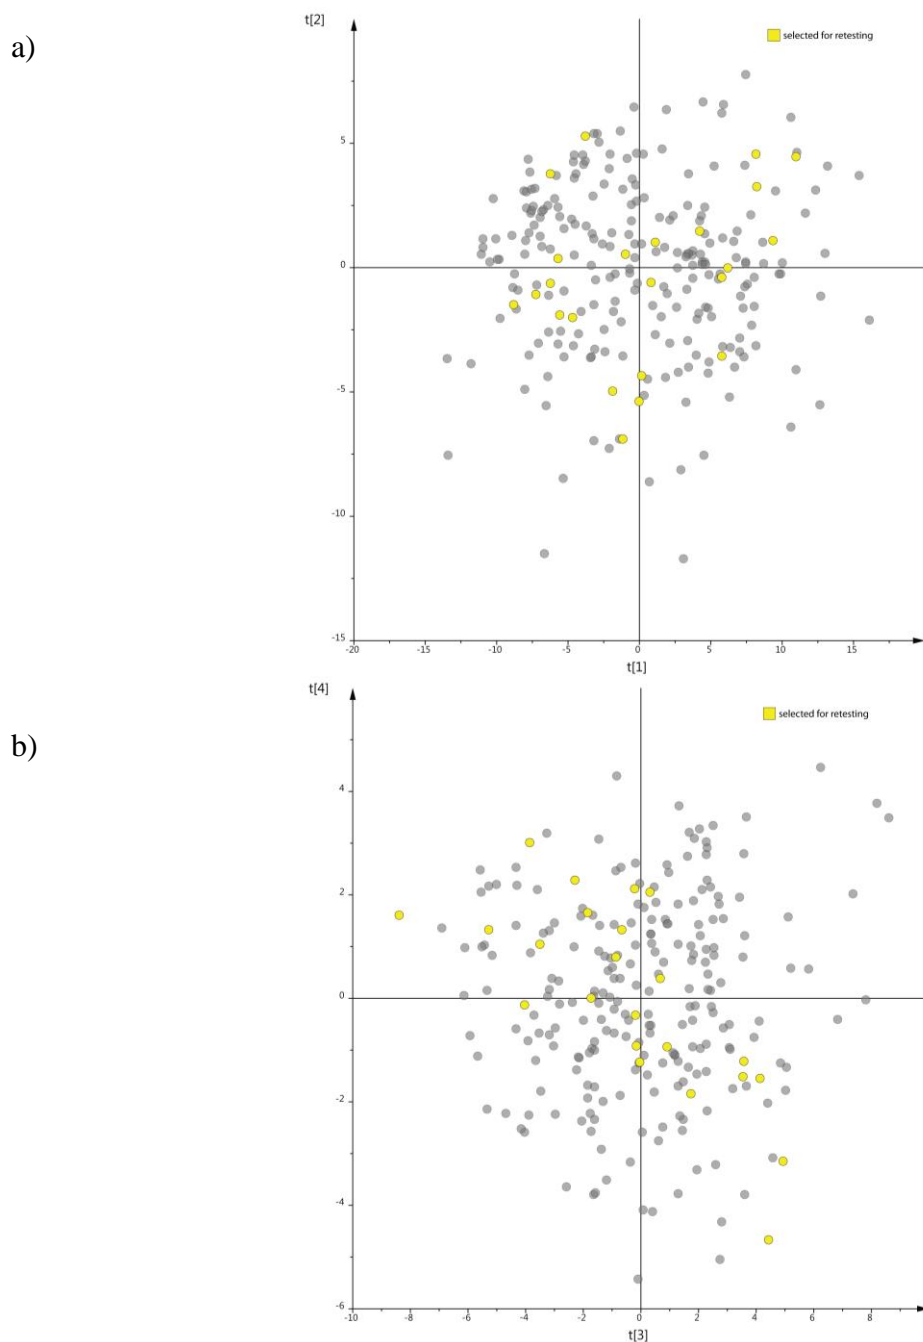

**Figure S12.** Chemical space of AChE1 hits showing 31-69% inhibition. Score plots from PCA of the physicochemical properties of the 248 hits showing at least 31-69% inhibition in the HTS, hits manually selected for  $IC_{50}$  determination colored in yellow (set B). The first and second components describe the size and hydrophobicity of the hits (a) and the third and fourth components show diversity relating to flexibility and charge (b).

## SUPPORTING INFORMATION

a)

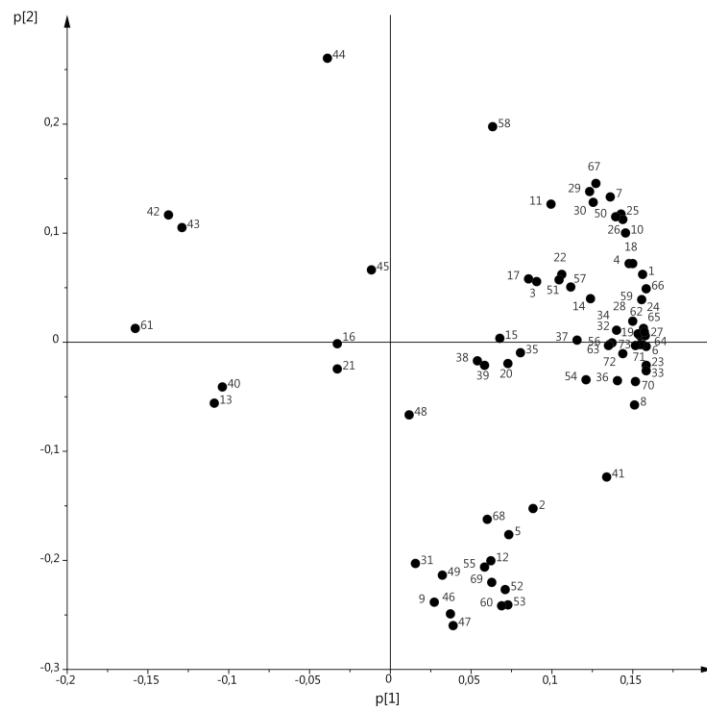

b)

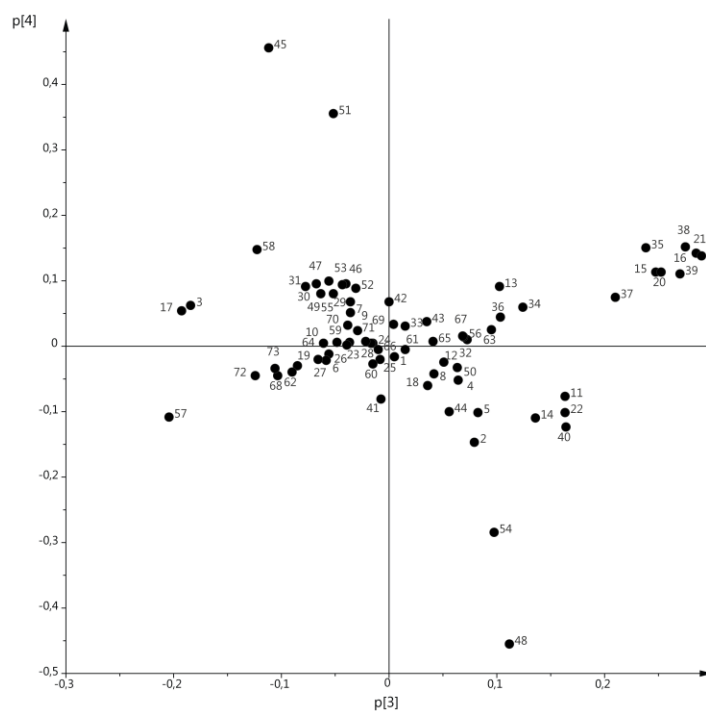

**Figure S13.** Chemical space of AChE1 hits showing 31-69% inhibition. PCA loading plots of (a) p1 versus p2 and (b) p3 versus p4. The physicochemical descriptors included in the model are labeled with the numbers assigned in Table S5.

## SUPPORTING INFORMATION

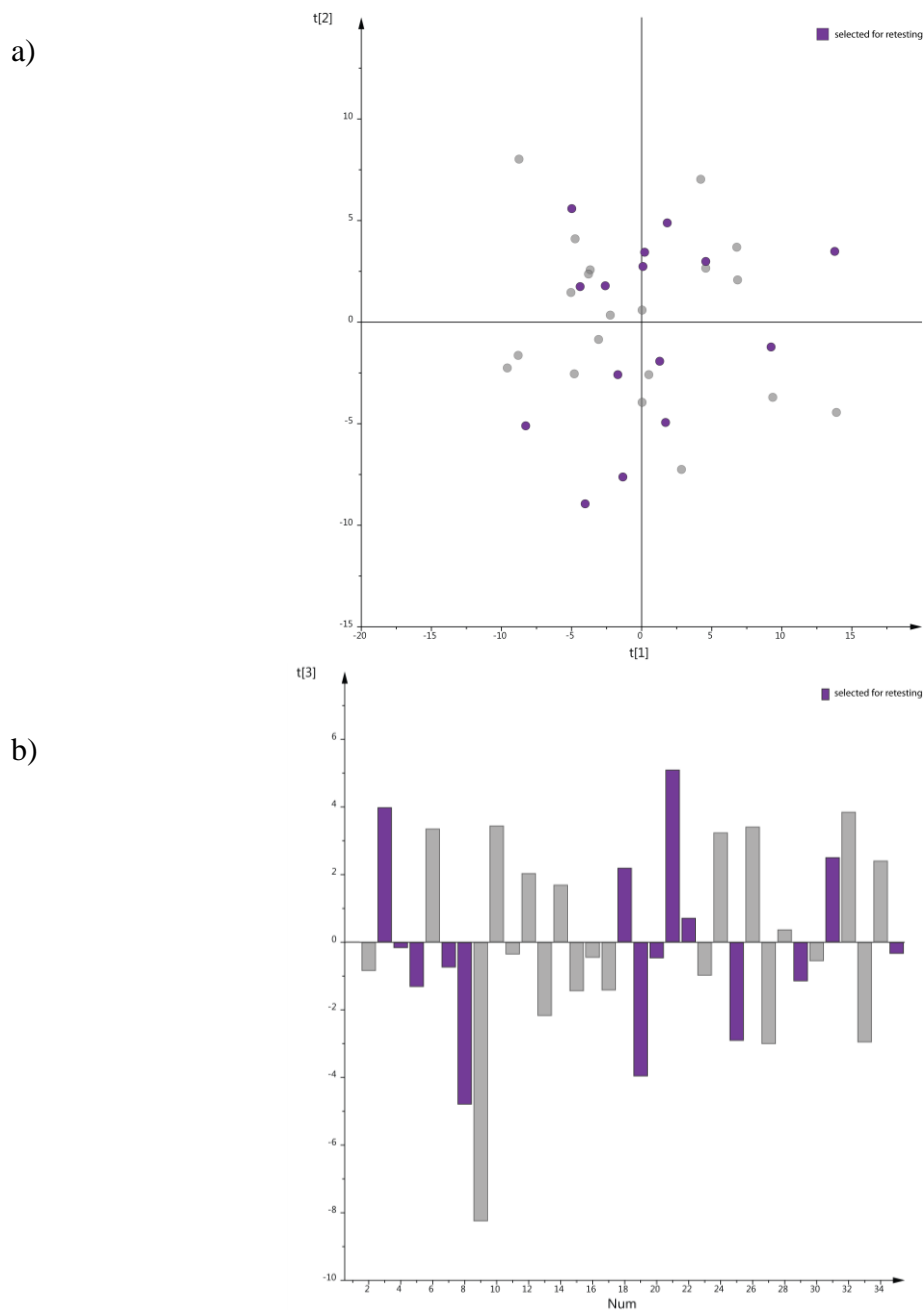

**Figure S14.** Chemical space of AChE1 hits showing  $\geq 30\%$  difference in inhibition between Ag- and AaAChE1. PCA of the physicochemical properties of the 35 hits showing at least 30% difference in inhibition between Aa- and AgAChE1 in the HTS, hits manually selected for  $IC_{50}$  determination colored in purple (set D1 and D2). The first and second components describe the size and hydrophobicity of the hits (a) and the third component shows diversity relating to flexibility (b).

## SUPPORTING INFORMATION

a)

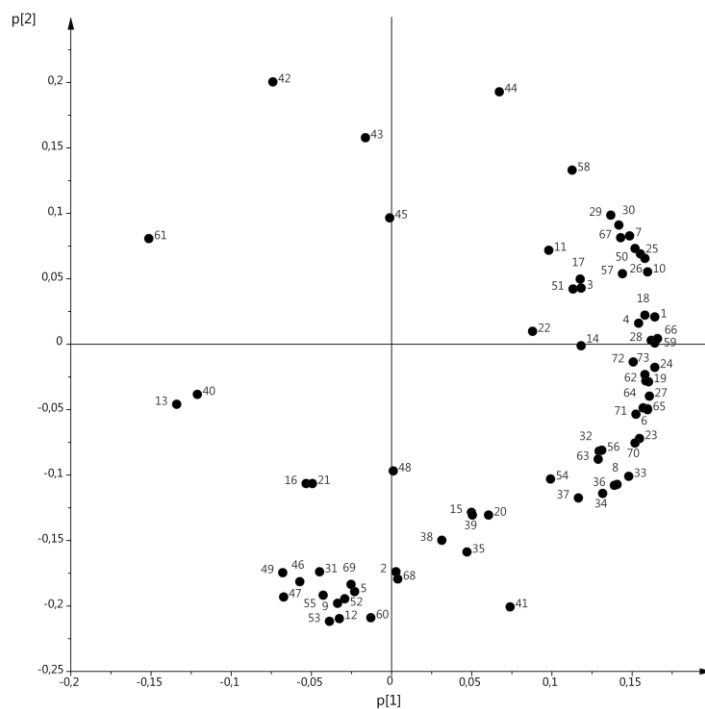

b)

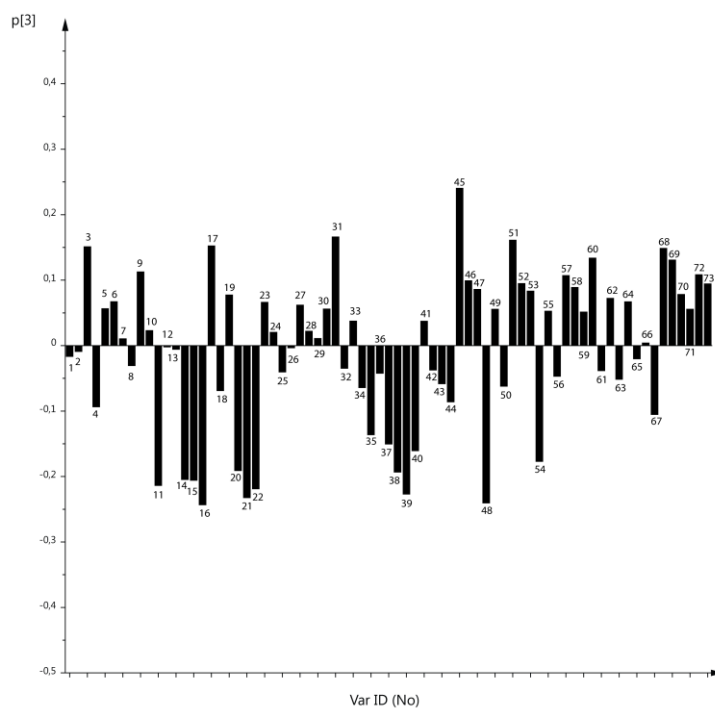

**Figure S15.** Chemical space of AChE1 hits showing  $\geq 30\%$  difference in inhibition between Ag- and AaAChE1. PCA loading plots of (a) p1 versus p2 and (b) p3. The physicochemical descriptors included in the model are labeled with the numbers assigned in Table S5.

## SUPPORTING INFORMATION

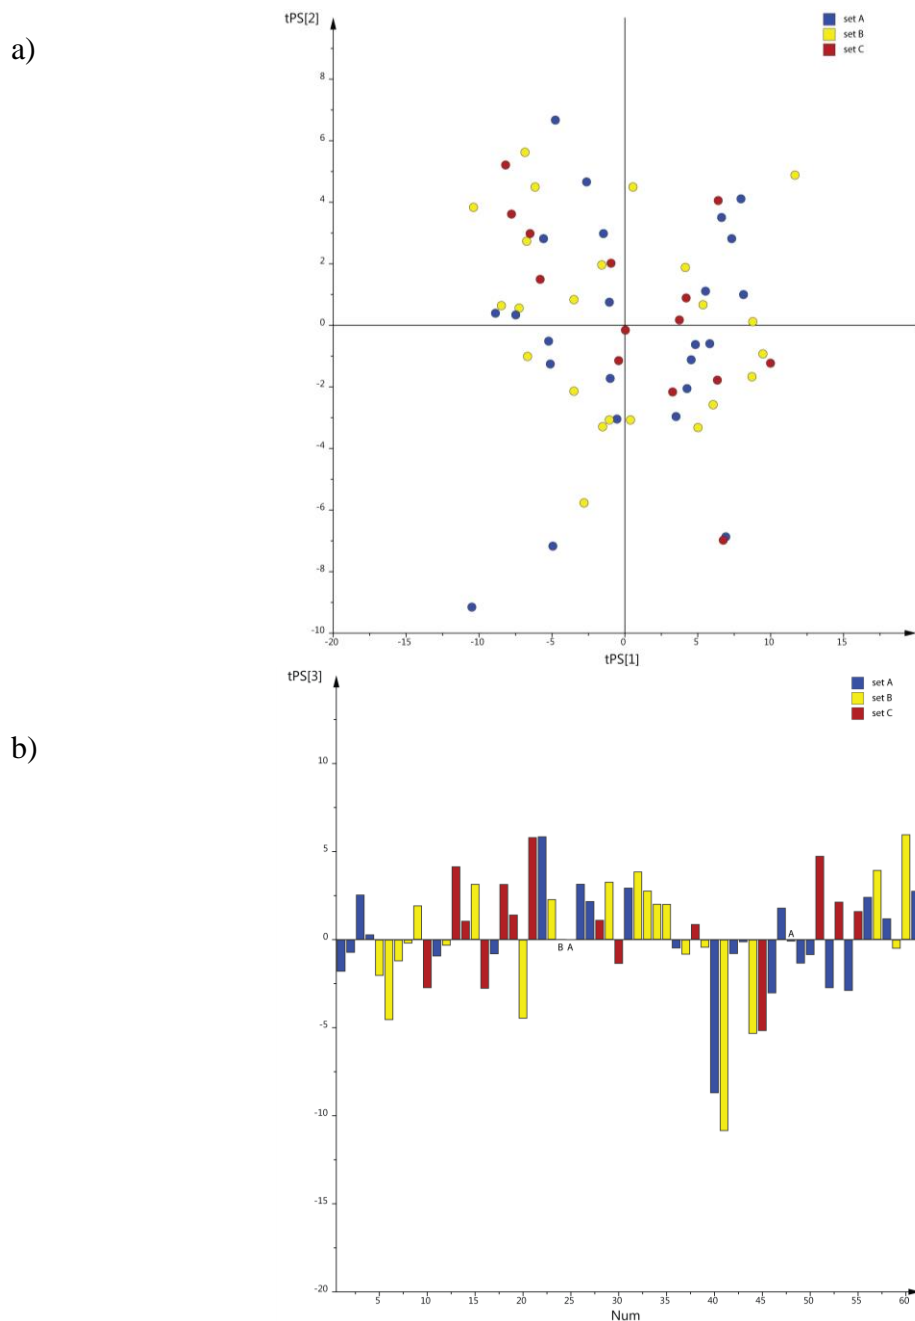

**Figure S16.** Chemical space of AChE1 hits in sets A and B. Score plots from PCA of the physicochemical properties of the 47 hits in sets A (blue) and B (yellow) selected for IC<sub>50</sub> determinations. Compounds of set C ( $\leq 30\%$  inhibition; red) were manually selected from compounds with similar structures and physicochemical properties as the compounds in set A and B and have here been projected into the chemical space. The first and second components describe the size and flexibility of the hits (a) and the third component shows diversity relating to polarity and charge (b).

# SUPPORTING INFORMATION

a)

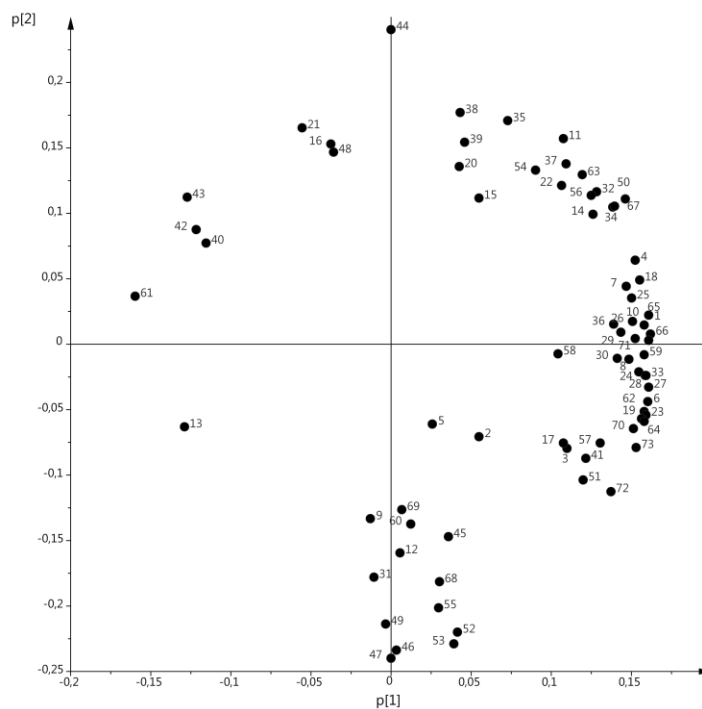

b)

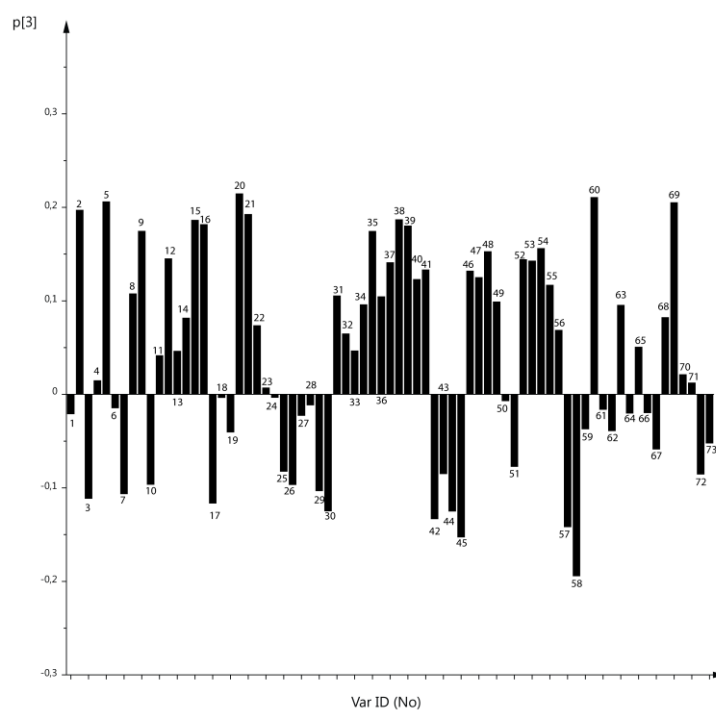

**Figure S17.** Chemical space of AChE1 hits in sets A and B. PCA loading plots of (a) p1 versus p2 and (b) p3. The physicochemical descriptors included in the model are labeled with the numbers assigned in Table S5.



## SUPPORTING INFORMATION

## Complete inhibition results for all the re-tested compounds

**Table S6.** The complete inhibition results for all the re-tested compounds.

| ID    | set | HTS (%) |         |                    | IC <sub>50</sub> (μM) <sup>a</sup> |         |       | % activity at 200 μM <sup>b</sup> |         |       | S.R.             |                               |
|-------|-----|---------|---------|--------------------|------------------------------------|---------|-------|-----------------------------------|---------|-------|------------------|-------------------------------|
|       |     | AgAChE1 | AaAChE1 | hAChE <sup>c</sup> | AgAChE1                            | AaAChE1 | hAChE | AgAChE1                           | AaAChE1 | hAChE | HTS <sup>d</sup> | IC <sub>50</sub> <sup>e</sup> |
| 2     | A   | 92      | 76      | 12                 | 0.21                               | 0.22    | 31    |                                   |         |       | 6.3              | 141                           |
| 3     | A   | 86      | 90      | 33                 | >100                               | >100    | >200  | 50                                | 49      | 71    | 2.6              |                               |
| 4     | A   | 94      | 93      | 56                 | 8                                  | 9       | 5     |                                   |         |       | 1.7              | 0.6                           |
| 5     | A   | 76      | 82      | -12                | >1000                              | >1000   | >1000 | 84                                | 91      | 78    | 76               |                               |
| C0076 | A   | 81      | 78      | -14                | >1000                              | >1000   | >1000 | 87                                | 96      | 92    | 78               |                               |
| C0147 | A   | 94      | 95      | 2                  | 0.7                                | 0.8     | >200  |                                   |         | 45    | 47               | >250                          |
| C0656 | A   | 69      | 79      | -1                 | 2                                  | 2       | 80    |                                   |         |       | 69               | 40                            |
| C0710 | A   | 88      | 88      | 57                 | 0.7                                | 0.7     | 7     |                                   |         |       | 1.5              | 10                            |
| C1457 | A   | 87      | 89      | 66                 | 0.4                                | 0.3     | 5     |                                   |         |       | 1.3              | 13                            |
| C2681 | A   | 86      | 88      | -11                | 1                                  | 1       | >1000 |                                   |         | 88    | 86               | >1000                         |
| C2810 | A   | 89      | 93      | 6                  | 1                                  | 2       | >200  |                                   |         | 58    | 14.8             | >100                          |
| C3029 | A   | 74      | 78      | -16                | 3                                  | 3       | >1000 |                                   |         | 80    | 74               | >333                          |
| C4127 | A   | 92      | 96      | 85                 | 0.4                                | 0.4     | 3     |                                   |         |       | 1.1              | 7.5                           |
| C4514 | A   | 92      | 78      | -9                 | 10                                 | 9       | >200  |                                   |         | 56    | 67               | >20                           |
| C4584 | A   | 76      | 72      | 7                  | 16                                 | 6       | >1000 |                                   |         | 91    | 10.3             | >63                           |
| C5063 | A   | 91      | 81      | -11                | 2                                  | 1       | 72    |                                   |         |       | 81               | 36                            |
| C5651 | A   | 96      | 95      | 83                 | 5                                  | 4       | 3     |                                   |         |       | 1.1              | 0.6                           |
| C6233 | A   | 86      | 82      | 28                 | 86                                 | 66      | >1000 |                                   |         | 83    | 2.9              | >12                           |
| C6483 | A   | 86      | 89      | 9                  | 4                                  | 4       | >300  |                                   |         | 84    | 9.6              | >75                           |
| C7066 | A   | 74      | 78      | -17                | 6                                  | 3       | >1000 |                                   |         | 80    | 74               | >167                          |
| C8319 | A   | 80      | 78      | 81                 | 5                                  | 5       | 2     |                                   |         |       | 1                | 0.4                           |
| C8405 | A   | 92      | 88      | -3                 | 1                                  | 1       | >200  |                                   |         | 65    | 88               | >200                          |
| C9464 | A   | 86      | 90      | -1                 | 4                                  | 3       | >300  |                                   |         | 71    | 86               | >75                           |
| C9940 | A   | 61      | 72      | 17                 | 2                                  | 2       | 10    |                                   |         |       | 3.6              | 5                             |
| 6     | B   | 23      | 38      | -7                 | >500                               | >500    | >500  | 80                                | 86      | 81    | 23               |                               |
| 7     | B   | 32      | 33      | 3                  | 17                                 | 12      | >200  |                                   |         | 58    | 11               | >12                           |
| C0269 | B   | 48      | 49      | -4                 | 9                                  | 9       | >1000 |                                   |         | 86    | 48               | >111                          |
| C1687 | B   | 13      | 36      | 57                 | >200                               | >200    | 19    | 54                                | 49      |       | 0.2              | <0.1                          |
| C1815 | B   | 22      | 48      | 70                 | n.d.                               | n.d.    | n.d.  |                                   |         |       | 0.3              |                               |
| C1844 | B   | 34      | 37      | 31                 | 7                                  | 6       | 13    |                                   |         |       | 1.1              | 2                             |
| C2599 | B   | 46      | 58      | -5                 | 22                                 | 19      | >400  |                                   |         | 58    | 46               | >18                           |
| C2972 | B   | 66      | 63      | -2                 | 9                                  | 9       | >1000 |                                   |         | 68    | 63               | >111                          |
| C3732 | B   | 24      | 43      | 3                  | 11                                 | 12      | 129   |                                   |         |       | 8                | 11                            |
| C3922 | B   | 56      | 0       | 15                 | >300                               | >300    | >300  | 72                                | 54      | 63    | 3.7              |                               |
| C4233 | B   | 47      | 30      | 37                 | >1000                              | >1000   | >1000 | 70                                | 79      | 63    | 0.8              |                               |
| C4790 | B   | 44      | 50      | 1                  | n.d.                               | n.d.    | n.d.  |                                   |         |       | 44               |                               |

## SUPPORTING INFORMATION

Table S6. Continued.

| ID        | set | HTS (%) |         |                    | IC <sub>50</sub> (μM) <sup>a</sup> |         |       | % activity at 200 μM <sup>b</sup> |         |       | S.R.             |                               |
|-----------|-----|---------|---------|--------------------|------------------------------------|---------|-------|-----------------------------------|---------|-------|------------------|-------------------------------|
|           |     | AgAChE1 | AaAChE1 | hAChE <sup>c</sup> | AgAChE1                            | AaAChE1 | hAChE | AgAChE1                           | AaAChE1 | hAChE | HTS <sup>d</sup> | IC <sub>50</sub> <sup>e</sup> |
| C5737     | B   | 65      | 67      | 0                  | 5                                  | 6       | >100  |                                   |         | 48    | 65               | >17                           |
| C6103     | B   | 46      | 51      | 22                 | 6                                  | 5       | >100  |                                   |         | 45    | 2.1              | >17                           |
| C6176     | B   | 57      | 66      | 81                 | 8                                  | 10      | 12    |                                   |         |       | 0.7              | 1                             |
| C6727     | B   | 53      | 53      | -5                 | 7                                  | 4       | >100  |                                   |         | 40    | 53               | >14                           |
| C7129     | B   | 47      | 56      | 6                  | 11                                 | 11      | >500  |                                   |         | 80    | 7.8              | >45                           |
| C7786     | B   | 39      | 45      | 18                 | 5                                  | 6       | >300  |                                   |         | 55    | 2.2              | >50                           |
| C7920     | B   | 37      | 41      | 6                  | >400                               | >400    | >400  | 62                                | 59      | 79    | 6.2              |                               |
| C7951     | B   | 58      | 53      | 32                 | n.d.                               | n.d.    | n.d.  |                                   |         |       | 1.7              |                               |
| C8584     | B   | 34      | 25      | 10                 | n.d.                               | n.d.    | n.d.  |                                   |         |       | 2.5              |                               |
| C8678     | B   | 41      | 57      | 19                 | >1000                              | >1000   | >1000 | 91                                | 83      | 98    | 2.2              |                               |
| C9503     | B   | 57      | 69      | 12                 | 2                                  | 2       | 47    |                                   |         |       | 4.8              | 24                            |
| <b>8</b>  | C   | 24      | 18      | 2                  | 21                                 | 19      | 43    |                                   |         |       | 9                | 2                             |
| C0459     | C   | 3       | 8       | -33                | >1000                              | >500    | >500  | 94                                | 61      | 73    | 3                |                               |
| C0890     | C   | 5       | -5      | 90                 | >1000                              | >1000   | >1000 | 109                               | 101     | 96    | 0                |                               |
| C1234     | C   | 1       | 8       | 84                 | >1000                              | >1000   | >100  | 97                                | 114     | 45    | 0                |                               |
| C1409     | C   | 4       | 13      | -28                | 69                                 | 54      | >1000 | 41                                | 37      | 81    | 4                | 14                            |
| C3666     | C   | 10      | 5       | 0                  | >1000                              | >1000   | >200  | 86                                | 76      | 54    | 5                |                               |
| C4098     | C   | -10     | -11     | 84                 | >1000                              | >1000   | >100  | 62                                | 94      | 44    | 0                |                               |
| C5156     | C   | -21     | -10     | 95                 | 11                                 | 12      | 0.6   |                                   |         |       | 0                | 0.05                          |
| C5504     | C   | 2       | -3      | -20                | n.d.                               | n.d.    | n.d.  |                                   |         |       | 1                |                               |
| C7422     | C   | 16      | 25      | -3                 | 73                                 | 128     | >600  |                                   |         | 70    | 16               | >5                            |
| C8086     | C   | 6       | 13      | 20                 | >100                               | >100    | >500  | 47                                | 43      | 79    | 0.3              |                               |
| C9083     | C   | -1      | -1      | -6                 | n.d.                               | n.d.    | n.d.  |                                   |         |       | 1                |                               |
| C9395     | C   | 0       | -9      | -15                | >1000                              | >1000   | >1000 | 102                               | 98      | 93    | 1                |                               |
| C9657     | C   | 2       | 2       | 3                  | >1000                              | >1000   | >200  | 85                                | 86      | 58    | 0.7              |                               |
| <b>9</b>  | D1  | 63      | 1       | -14                | >1000                              | >1000   | >1000 | 92                                | 105     | 86    | 1                |                               |
| C0273     | D1  | 45      | -1      | -11                | >1000                              | >1000   | >1000 | 88                                | 87      | 77    | 1                |                               |
| C1183     | D1  | 52      | -4      | 43                 | >1000                              | >1000   | >1000 | 97                                | 97      | 70    | 0                |                               |
| C1301     | D1  | 48      | 0       | 11                 | >1000                              | >1000   | >1000 | 103                               | 100     | 86    | 0.1              |                               |
| C1647     | D1  | 58      | 2       | -23                | >1000                              | >1000   | >1000 | 86                                | 91      | 89    | 2                |                               |
| C2956     | D1  | 53      | -5      | -1                 | >1000                              | >1000   | >1000 | 102                               | 116     | 99    | 1                |                               |
| C5320     | D1  | 42      | -3      | 11                 | >1000                              | >1000   | >1000 | 103                               | 106     | 97    | 0.1              |                               |
| C7765     | D1  | 40      | 2       | 8                  | >1000                              | >1000   | >1000 | 99                                | 94      | 65    | 0.3              |                               |
| C9077     | D1  | 37      | 0       | 35                 | >1000                              | >1000   | >1000 | 101                               | 116     | 103   | 0                |                               |
| <b>10</b> | D2  | 41      | 80      | 15                 | 3                                  | 3       | >200  |                                   |         | 55    | 2.7              | >67                           |
| C0552     | D2  | -27     | 77      | 2                  | 3                                  | 2       | >100  |                                   |         | 41    | 0.5              | >33                           |
| C0576     | D2  | -2      | 54      | 12                 | >1000                              | >1000   | >1000 | 104                               | 115     | 94    | 0.1              |                               |

## SUPPORTING INFORMATION

**Table S6.** Continued.

| ID       | set | HTS (%) |         |                    | IC <sub>50</sub> (μM) <sup>a</sup> |         |       | % activity at 200 μM <sup>b</sup> |         |       | S.R.             |                               |
|----------|-----|---------|---------|--------------------|------------------------------------|---------|-------|-----------------------------------|---------|-------|------------------|-------------------------------|
|          |     | AgAChE1 | AaAChE1 | hAChE <sup>c</sup> | AgAChE1                            | AaAChE1 | hAChE | AgAChE1                           | AaAChE1 | hAChE | HTS <sup>d</sup> | IC <sub>50</sub> <sup>e</sup> |
| C4073    | D2  | -5      | 80      | 40                 | n.d.                               | n.d.    | n.d.  |                                   |         |       | 0                |                               |
| C6303    | D2  | 17      | 47      | -16                | >200                               | >200    | >500  | 69                                | 58      | 87    | 17               |                               |
| C9270    | D2  | -40     | 69      | 15                 | n.d.                               | n.d.    | n.d.  |                                   |         |       | 0.1              |                               |
| <b>1</b> |     | 93      | 91      | 99                 | 0.26                               | 0.44    | 0.030 |                                   |         |       | 0.9              | 0.07                          |

<sup>a</sup>Compounds denoted n.d. could not be determined due to poor solubility. <sup>b</sup>If the IC<sub>50</sub> value could not be determined from the used concentration range the enzyme activity at a compound concentration of 200 μM is given for comparison. <sup>c</sup>Previously published.<sup>1</sup> <sup>d</sup>If a compound inhibited an enzyme by ≤ 0% in a HTS the inhibition was set to 1% prior to calculation. The selectivity ratios were computed by taking the lower of the compound's inhibition (%) values against AgAChE1 and AaAChE1, and dividing by its inhibition (%) value against hAChE. <sup>e</sup>Selectivity ratios were computed by taking the compound's IC<sub>50</sub> value against hAChE and dividing by the higher of its IC<sub>50</sub> values against AgAChE1 and AaAChE1.

Dose-response analyses for  $IC_{50}$  determinations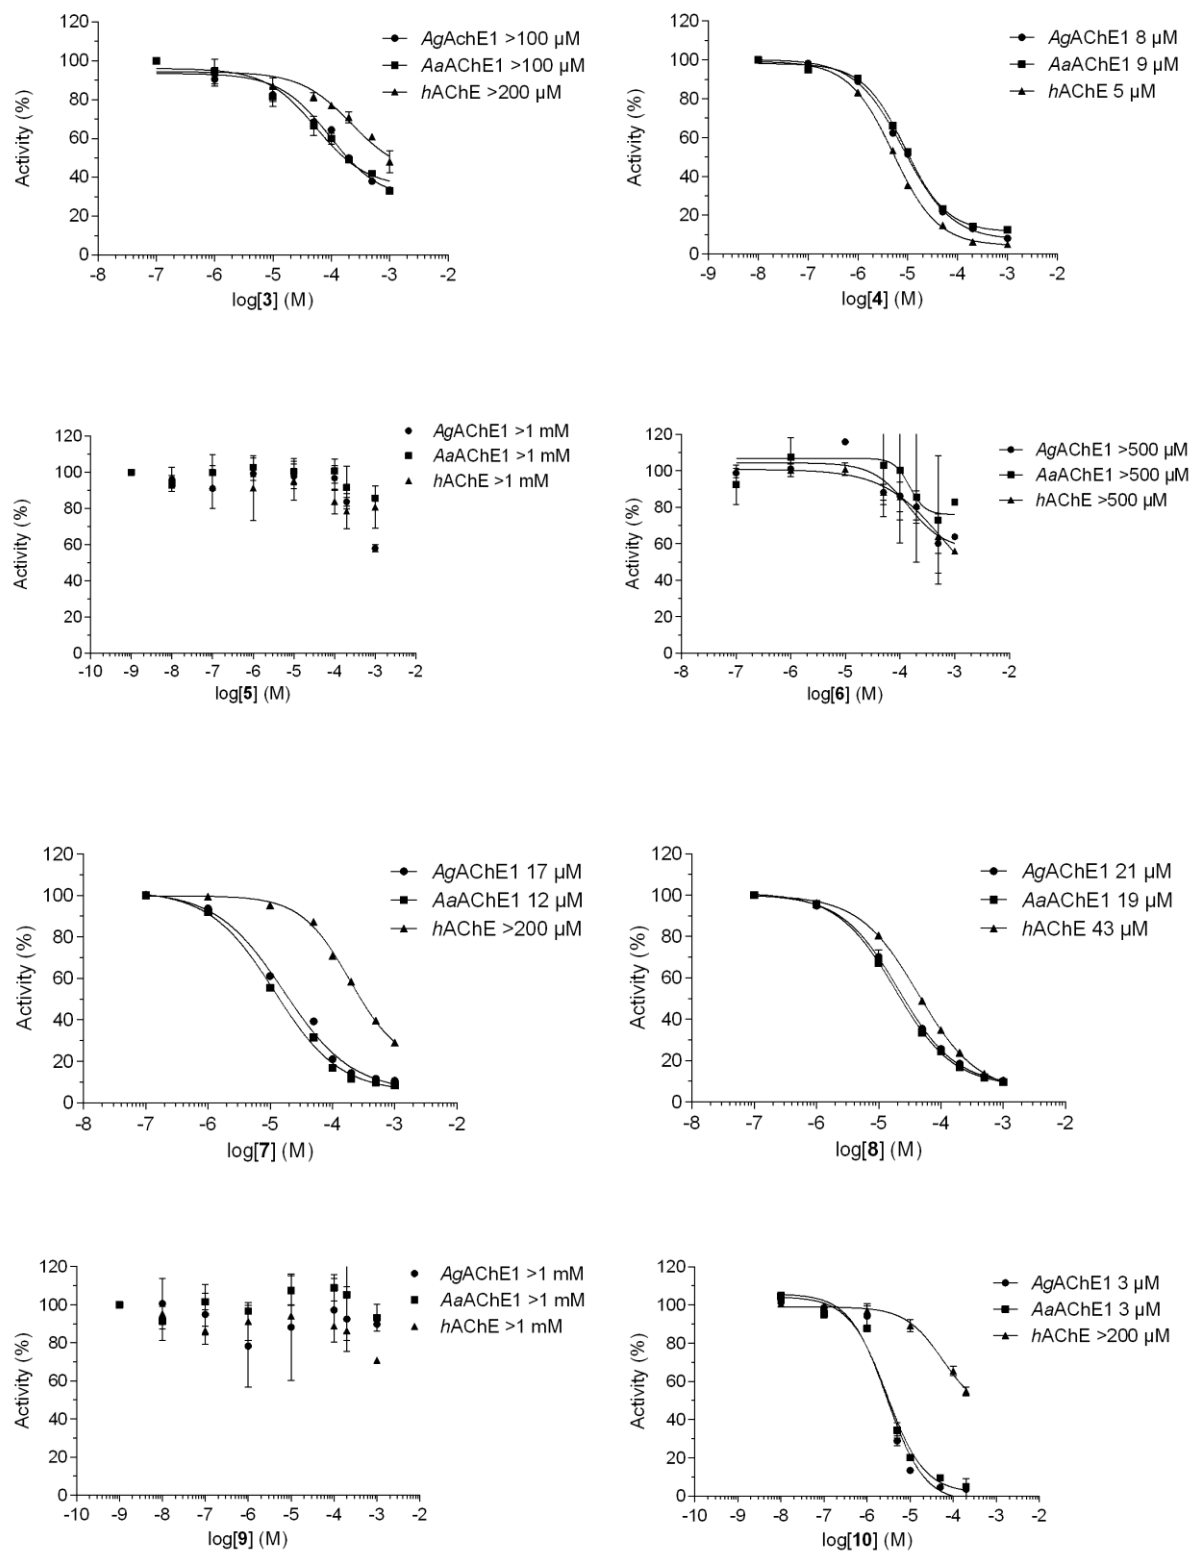**Figure S18.** Graphs showing  $IC_{50}$ -determinations of compounds 3-10 in Table 2.

OPLS-DA model of AChE1- and *h*AChE selective hits

**Table S7.** Model statistics of the refined OPLS-DA model used to separate variation in the physicochemical properties related to the difference between the AChE1- and *h*AChE selective hits.

|                                         |      |
|-----------------------------------------|------|
| No of hits                              | 157  |
| No of descriptors                       | 58   |
| No of components                        | 1+4  |
| Eigenvalue of predictive component      | 8.89 |
| Eigenvalue of last orthogonal component | 3.71 |
| R <sup>2</sup> X (cum)                  | 0.83 |
| R <sup>2</sup> Y (cum)                  | 0.52 |
| Q <sup>2</sup> (cum)                    | 0.38 |

## SUPPORTING INFORMATION

**Table S8.** Physicochemical descriptors included in the refined OPLS-DA model.

| No. | Descriptor | Equal<br>variance <sup>a</sup> | p-value <sup>b</sup>  | No. | Descriptor     | Equal<br>variance <sup>a</sup> | p-value <sup>b</sup> |
|-----|------------|--------------------------------|-----------------------|-----|----------------|--------------------------------|----------------------|
| 1   | a_aro      | no                             | 0.0052                | 30  | PEOE_PC-       | yes                            | 0.0033               |
| 2   | a_heavy    | yes                            | 0.00017               | 31  | PEOE_RPC+      | yes                            | 0.0027               |
| 3   | a_IC       | yes                            | 0.026                 | 32  | PEOE_RPC-      | no                             | 4.6x10 <sup>-5</sup> |
| 4   | a_ICM      | yes                            | 6.0x10 <sup>-5</sup>  | 33  | PEOE_VSA_FHYD  | yes                            | 7.3x10 <sup>-6</sup> |
| 5   | a_nC       | yes                            | 0.037                 | 34  | PEOE_VSA_FNEG  | yes                            | 0.00033              |
| 6   | a_nH       | yes                            | 0.0011                | 35  | PEOE_VSA_FPNEG | yes                            | 0.00019              |
| 7   | a_nO       | yes                            | 0.00019               | 36  | PEOE_VSA_FPOL  | yes                            | 7.3x10 <sup>-6</sup> |
| 8   | a_nS       | yes                            | 0.028                 | 37  | PEOE_VSA_FPOS  | yes                            | 0.00033              |
| 9   | bpol       | yes                            | 0.066                 | 38  | PEOE_VSA_FPPOS | yes                            | 7.8x10 <sup>-5</sup> |
| 10  | b_1rotN    | yes                            | 0.060                 | 39  | PEOE_VSA_NEG   | yes                            | 5.9x10 <sup>-5</sup> |
| 11  | b_1rotR    | yes                            | 0.00012               | 40  | PEOE_VSA_PNEG  | yes                            | 0.00017              |
| 12  | b_ar       | no                             | 0.0044                | 41  | PEOE_VSA_POL   | yes                            | 1.3x10 <sup>-5</sup> |
| 13  | b_double   | yes                            | 3.0x10 <sup>-8</sup>  | 42  | PEOE_VSA_PPOS  | yes                            | 9.6x10 <sup>-5</sup> |
| 14  | b_heavy    | yes                            | 0.00020               | 43  | rings          | yes                            | 0.0027               |
| 15  | b_max1len  | yes                            | 0.063                 | 44  | SlogP          | yes                            | 0.0024               |
| 16  | b_rotR     | yes                            | 0.0023                | 45  | SMR            | yes                            | 0.0032               |
| 17  | b_single   | yes                            | 0.032                 | 46  | TPSA           | yes                            | 2.8x10 <sup>-6</sup> |
| 18  | chi0       | yes                            | 4.5x10 <sup>-5</sup>  | 47  | VAdjEq         | no                             | 4.0x10 <sup>-5</sup> |
| 19  | chi0v      | yes                            | 0.0017                | 48  | VAdjMa         | no                             | 8.2x10 <sup>-5</sup> |
| 20  | chi1       | yes                            | 0.00043               | 49  | VDistMa        | no                             | 2.7x10 <sup>-5</sup> |
| 21  | chi1v      | yes                            | 0.032                 | 50  | vdw_area       | yes                            | 0.041                |
| 22  | chi1_C     | yes                            | 0.041                 | 51  | vdw_vol        | yes                            | 0.033                |
| 23  | density    | yes                            | 6.1x10 <sup>-6</sup>  | 52  | vsa_acc        | yes                            | 6.5x10 <sup>-5</sup> |
| 24  | Kier1      | yes                            | 0.00022               | 53  | vsa_other      | yes                            | 1.5x10 <sup>-9</sup> |
| 25  | KierA1     | yes                            | 0.066                 | 54  | vsa_pol        | yes                            | 0.00086              |
| 26  | KierA3     | no                             | 0.011                 | 55  | Weight         | yes                            | 0.00016              |
| 27  | KierFlex   | yes                            | 0.028                 | 56  | weinerPath     | yes                            | 0.021                |
| 28  | logS       | yes                            | 3.2x10 <sup>-13</sup> | 57  | weinerPol      | yes                            | 3.0x10 <sup>-6</sup> |
| 29  | PEOE_PC+   | yes                            | 0.0033                | 58  | zagreb         | yes                            | 3.6x10 <sup>-5</sup> |

<sup>a</sup>According to F-test for sample variance based on the sets of *hAChE*- and the *AChE1* selective hits in the model ( $\alpha = 0.05$ ). <sup>b</sup>According to Student's T-test (two-tailed with  $\alpha = 0.05$ ) assuming equal or unequal variance as decided by the F-test.

# SUPPORTING INFORMATION

a)

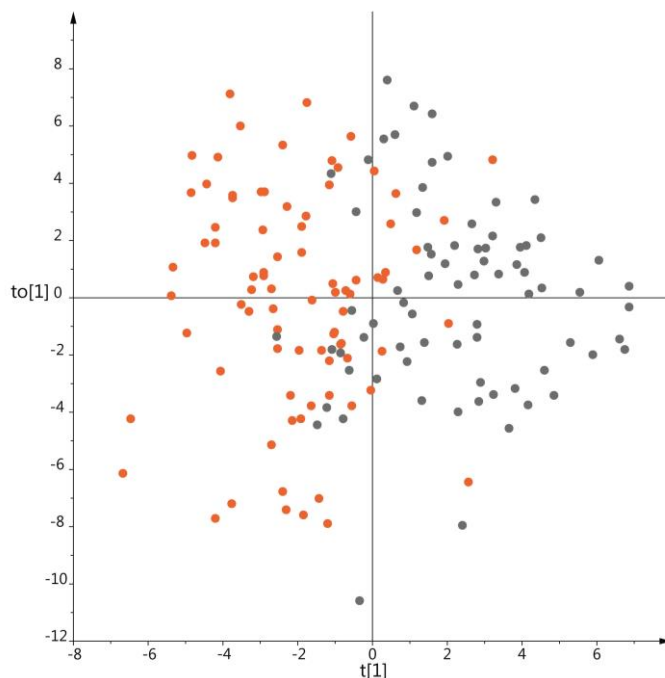

b)

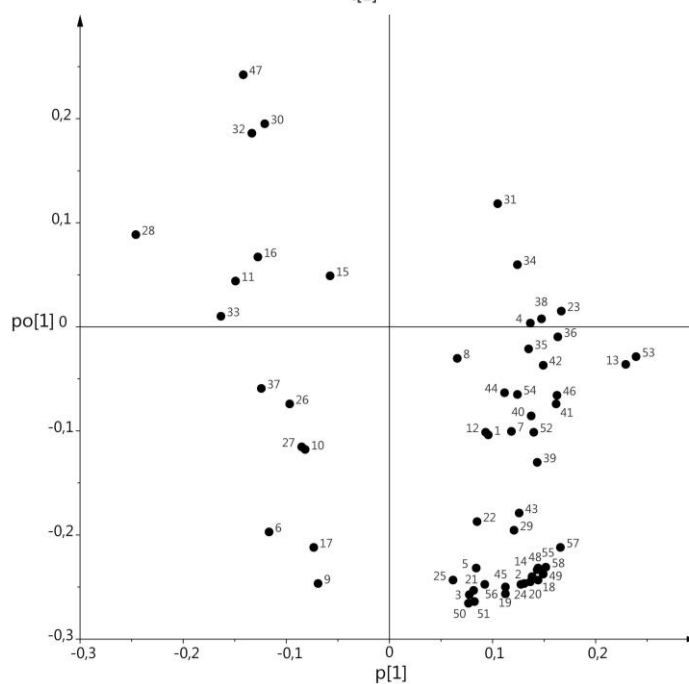

**Figure S19.** Score- and loading plot from the OPLS-DA model. a) Plot showing the score vectors of the predictive component ( $t[1]$ ) vs. the first orthogonal component ( $to[1]$ ). Hits showing potential selectivity for AChE1 and *h*AChE are shown as orange and grey dots, respectively. b) Plot showing the loading vectors of the predictive component ( $p[1]$ ) vs. the first orthogonal component ( $po[1]$ ). The predictive component mainly show separation due to size and flexibility.

# SUPPORTING INFORMATION

NMR spectrum of compounds 3-10.

**1-[3-(benzyloxy)-4-methoxybenzyl]-4-(4-fluorophenyl)-1,2,3,6-tetrahydropyridine (3).**  $^1\text{H}$  NMR (400 MHz,  $(\text{CD}_3)_2\text{SO}$ ); LC-MS (ES) calcd for  $\text{C}_{26}\text{H}_{27}\text{FNO}_2$  ( $\text{M} + \text{H}$ ) + 404, found 404

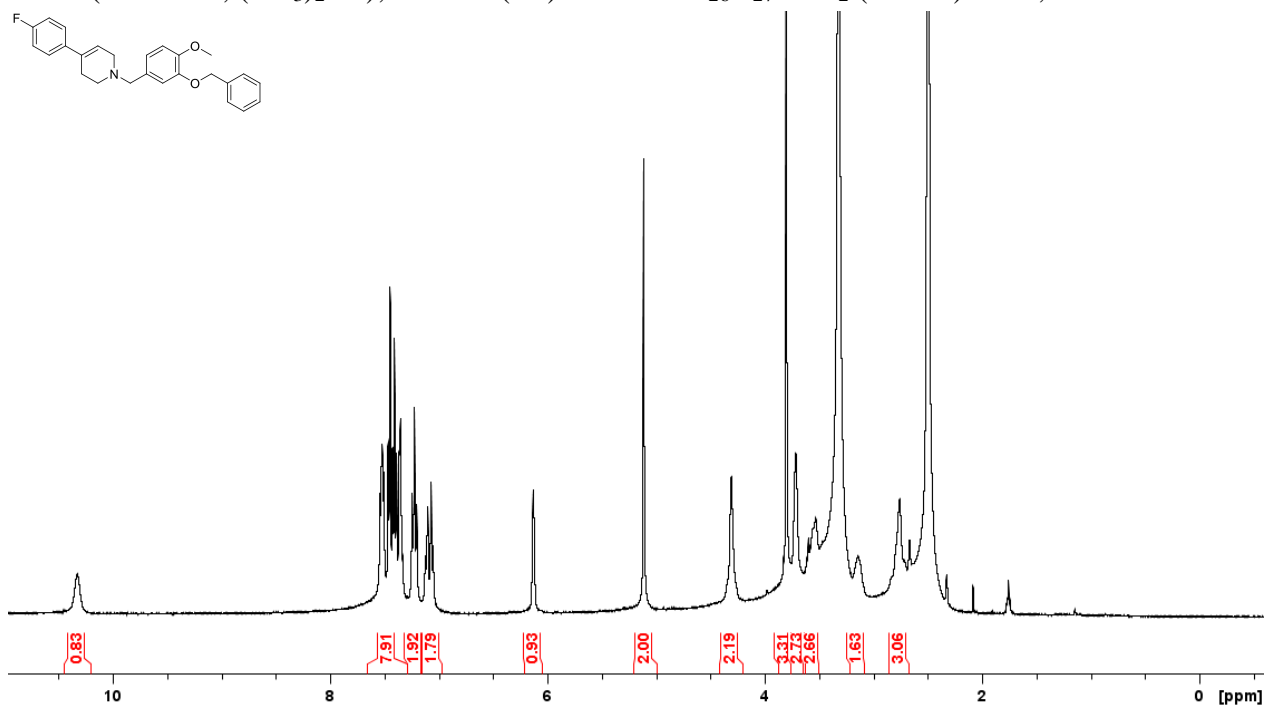

**7-benzyl-2-(ethylthio)-3-phenyl-5,6,7,8-tetrahydropyrido[4',3':4,5]thieno[2,3-d]pyrimidin-4(3H)-one (4).**  $^1\text{H}$  NMR (400 MHz,  $(\text{CD}_3)_2\text{SO}$ ); LC-MS (ES) calcd for  $\text{C}_{24}\text{H}_{24}\text{N}_3\text{OS}_2$  ( $\text{M} + \text{H}$ ) + 435, found 435

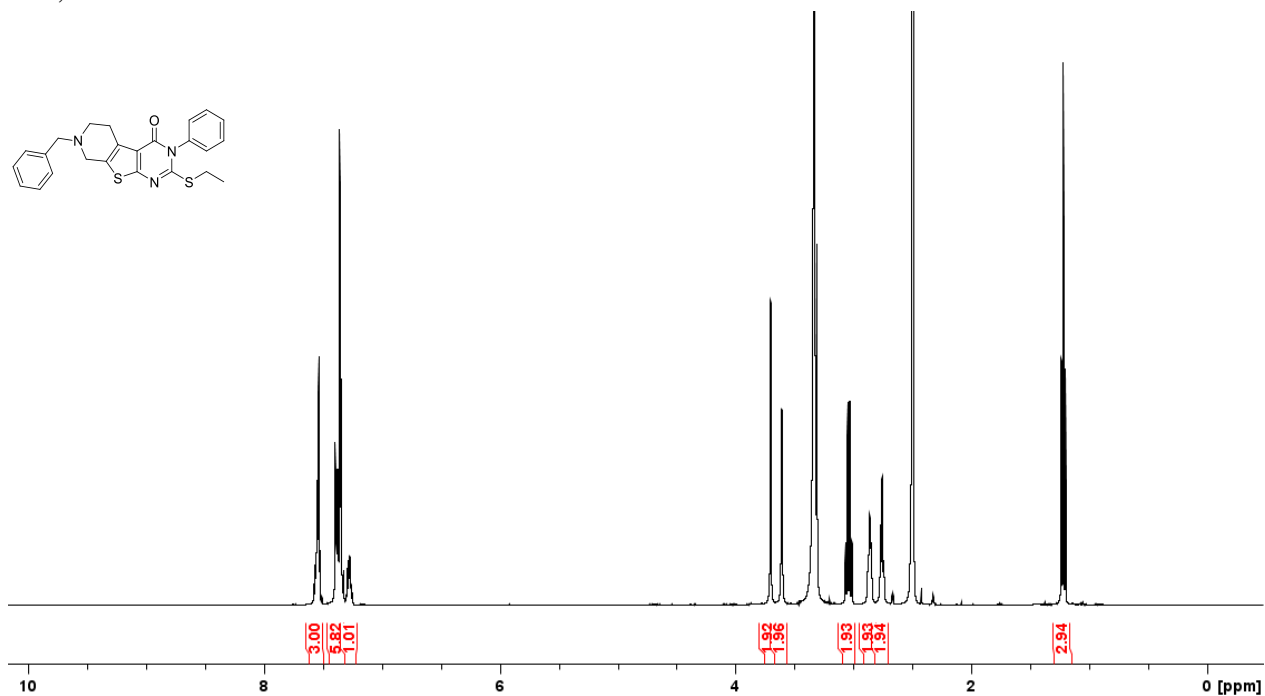



## SUPPORTING INFORMATION

**N-(2-[[5-(2-furyl)-4-phenyl-4H-1,2,4-triazol-3-yl]thio]ethyl)benzenesulfonamide (5).**  $^1\text{H}$   
NMR (400 MHz,  $(\text{CD}_3)_2\text{SO}$ ); LC-MS calcd for  $\text{C}_{20}\text{H}_{19}\text{N}_4\text{O}_3\text{S}_2$  ( $\text{M} + \text{H}$ ) $^+$  428, found 428

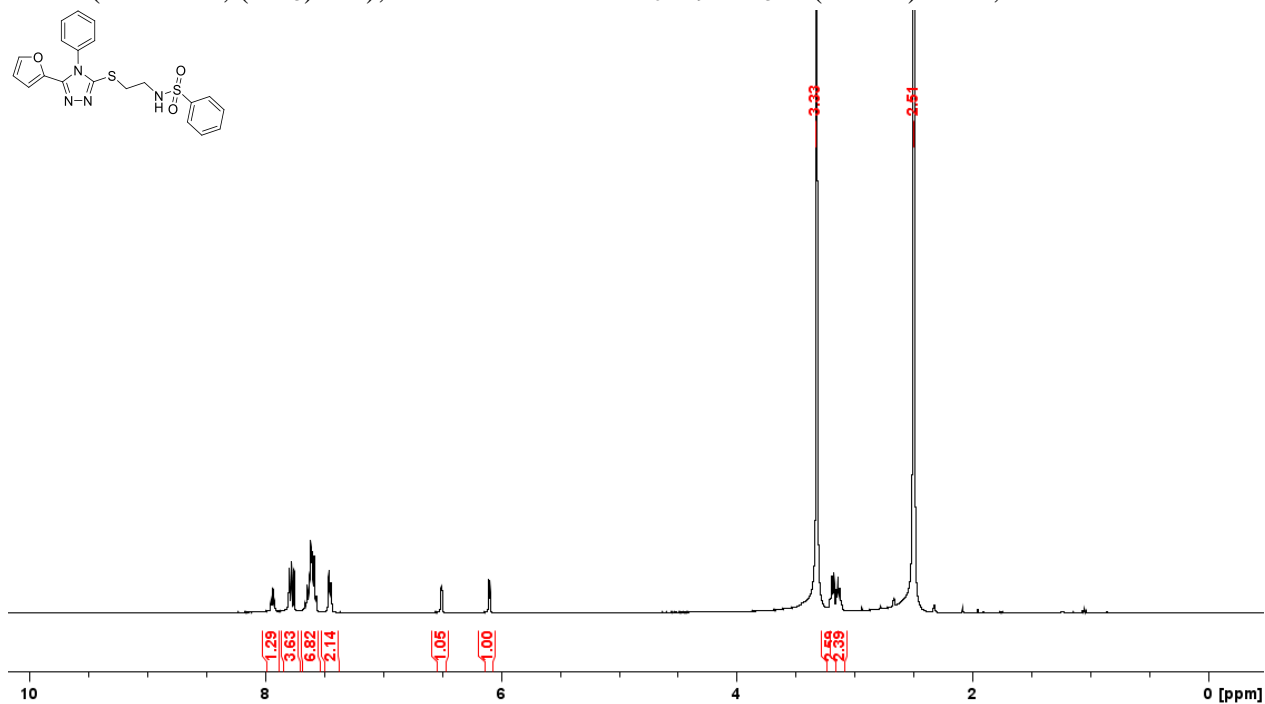

**N-{2-[(2-fluorobenzyl)oxy]benzyl}-2-(4-morpholinyl)ethanamine dihydrochloride (6).**  $^1\text{H}$   
NMR (400 MHz,  $(\text{CD}_3)_2\text{SO}$ ); LC-MS calcd for  $\text{C}_{20}\text{H}_{26}\text{FN}_2\text{O}_2$  ( $\text{M} + \text{H}$ ) $^+$  345, found 345

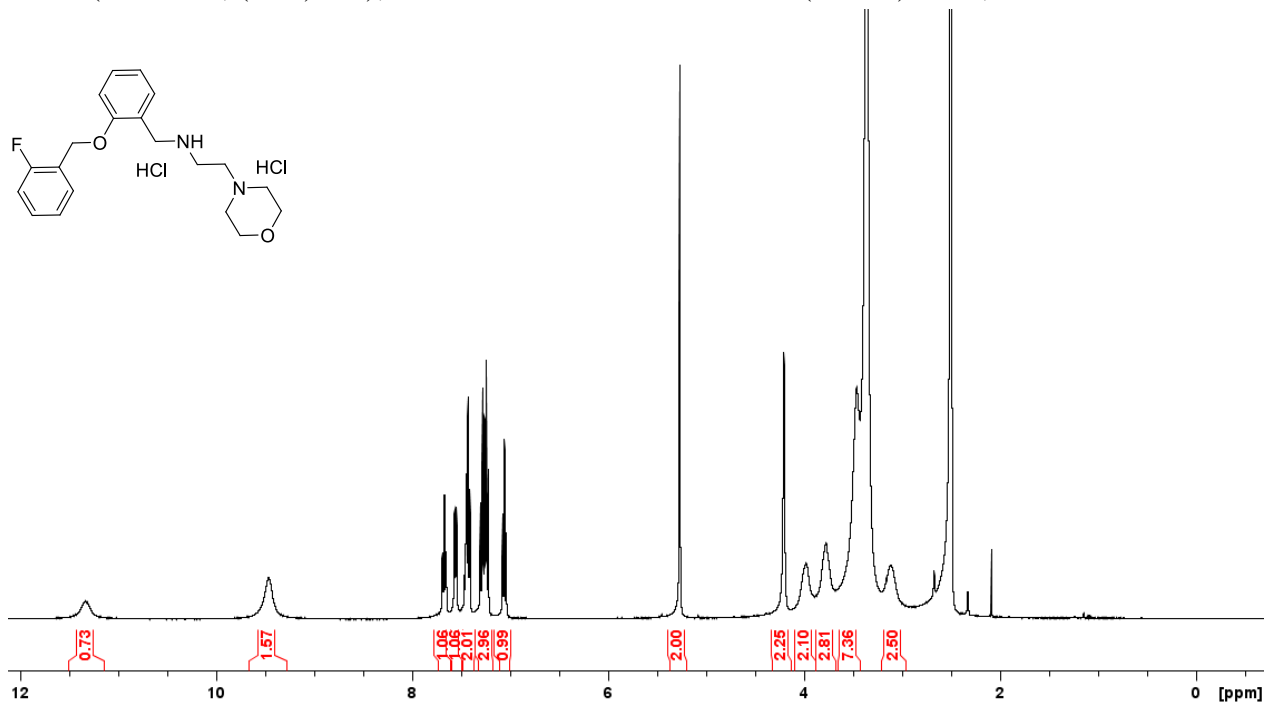

# SUPPORTING INFORMATION

**1-(1-benzyl-4-piperidiny)-4-(2-fluorobenzoyl)piperazine (7).**  $^1\text{H}$  NMR (400 MHz,  $(\text{CD}_3)_2\text{SO}$ , 328 K); LC-MS calcd for  $\text{C}_{23}\text{H}_{29}\text{FN}_3\text{O}$  ( $\text{M} + \text{H}$ ) $^+$  382, found 382

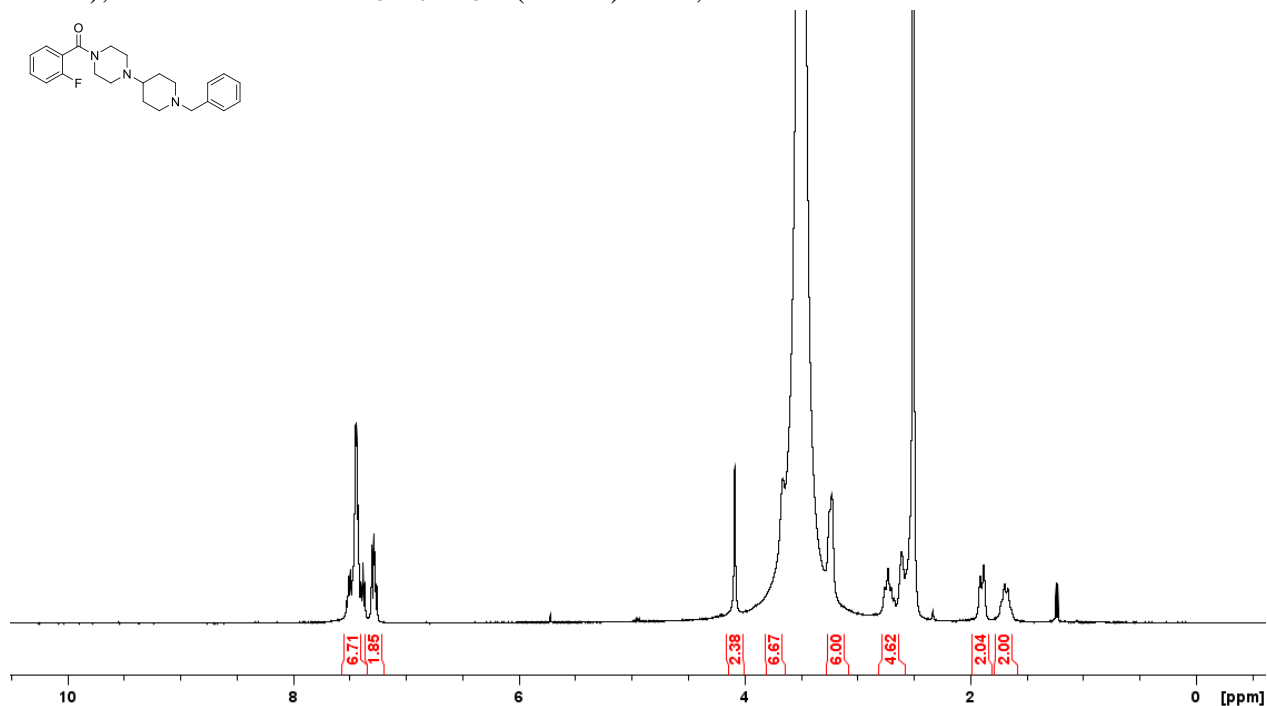

**1-(1-benzyl-4-piperidiny)-4-(phenoxyacetyl)piperazine (8).**  $^1\text{H}$  NMR (400 MHz,  $(\text{CD}_3)_2\text{SO}$ , 328 K); LC-MS calcd for  $\text{C}_{24}\text{H}_{32}\text{N}_3\text{O}_2$  ( $\text{M} + \text{H}$ ) $^+$  395, found 395

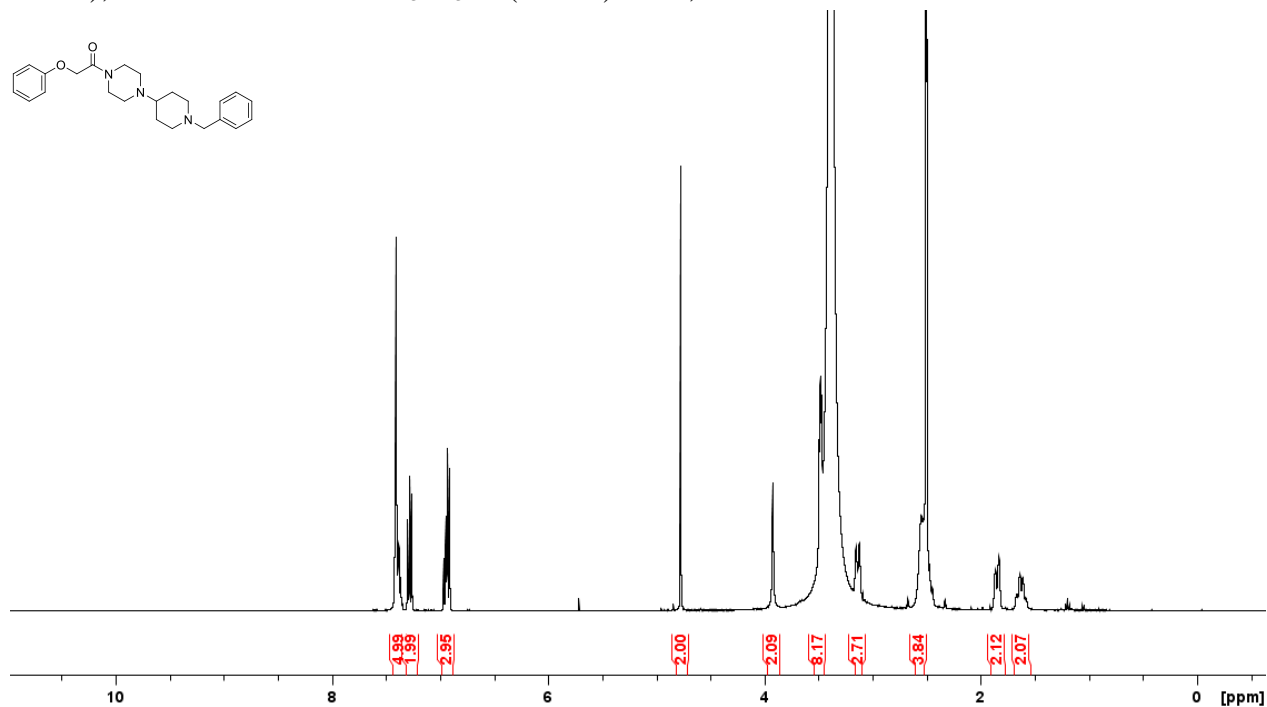

# SUPPORTING INFORMATION

**5-([4-(4-ethoxyphenyl)-5-phenyl-4H-1,2,4-triazol-3-yl]thio)methyl)-3-(2-methylphenyl)-1,2,4-oxadiazole (9).**  $^1\text{H}$  NMR (400 MHz,  $(\text{CD}_3)_2\text{SO}$ ); LC-MS calcd for  $\text{C}_{26}\text{H}_{24}\text{N}_5\text{O}_2\text{S}$  ( $\text{M} + \text{H}$ )<sup>+</sup> 471, found 471

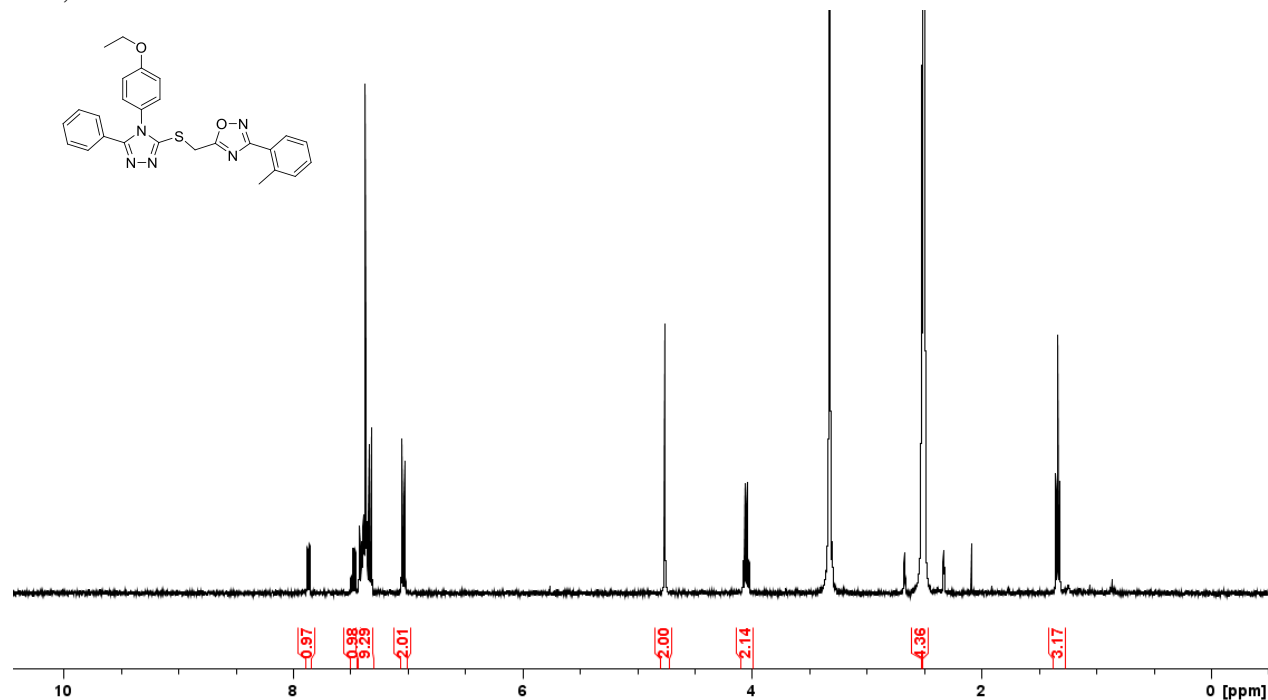

**2-[4-(benzyloxy)benzyl]-1,2,3,4-tetrahydroisoquinoline (10).**  $^1\text{H}$  NMR (400 MHz,  $(\text{CD}_3)_2\text{SO}$ ); LC-MS calcd for  $\text{C}_{23}\text{H}_{24}\text{NO}$  ( $\text{M} + \text{H}$ )<sup>+</sup> 330, found 330

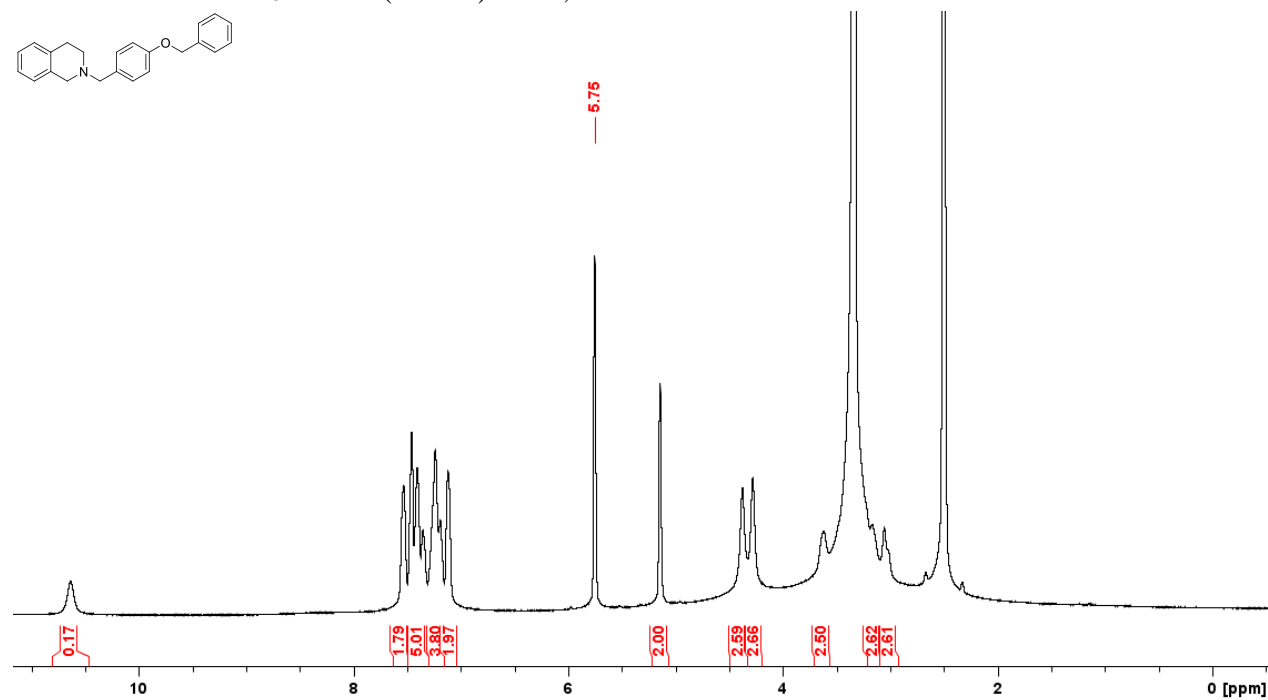

# SUPPORTING INFORMATION

## $^1\text{H}$ and $^{13}\text{C}$ NMR spectrum of synthesized compounds

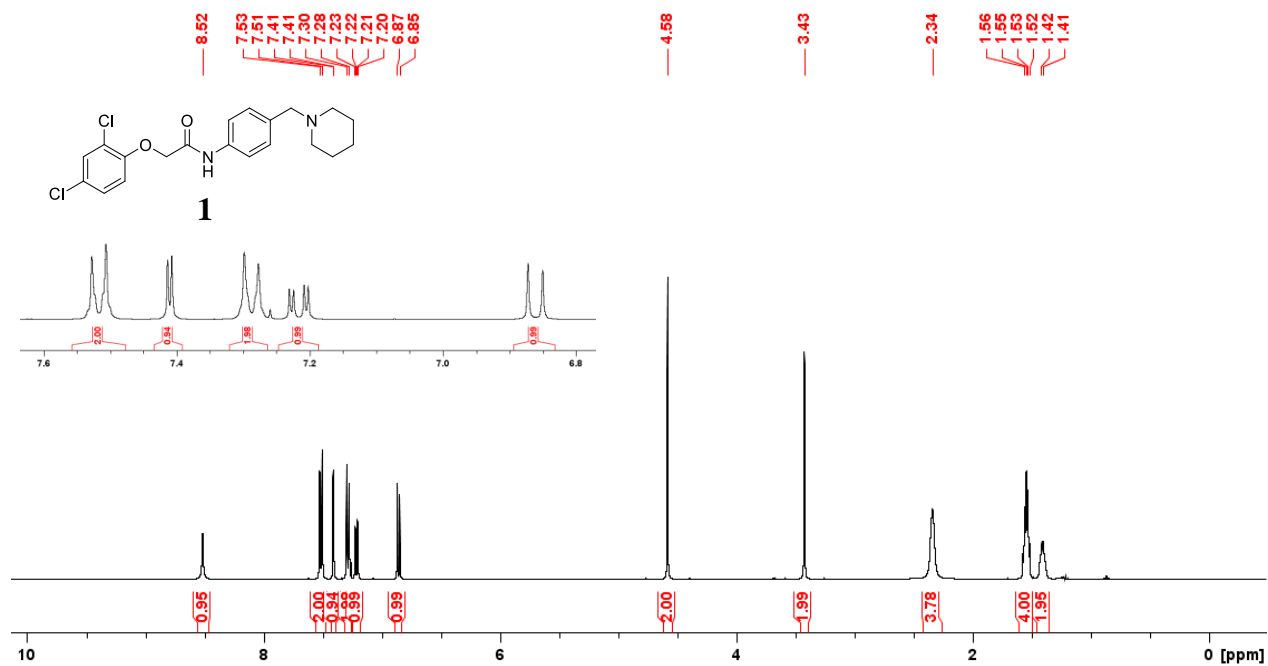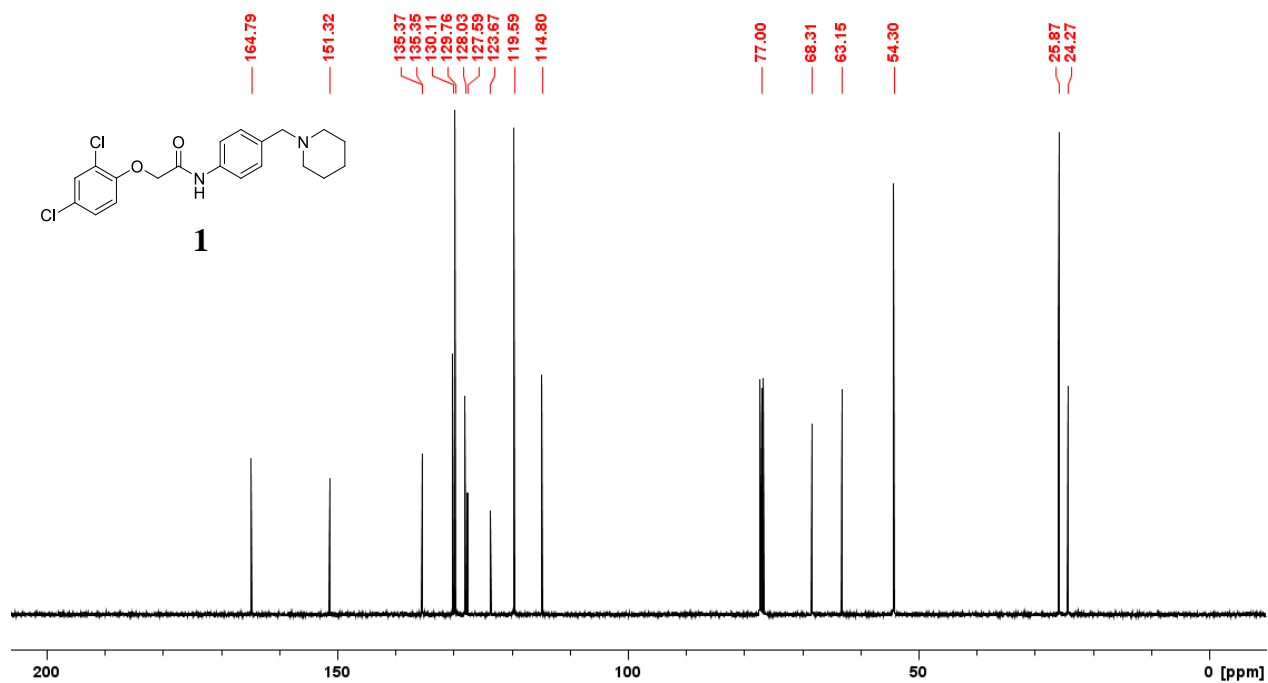

# SUPPORTING INFORMATION

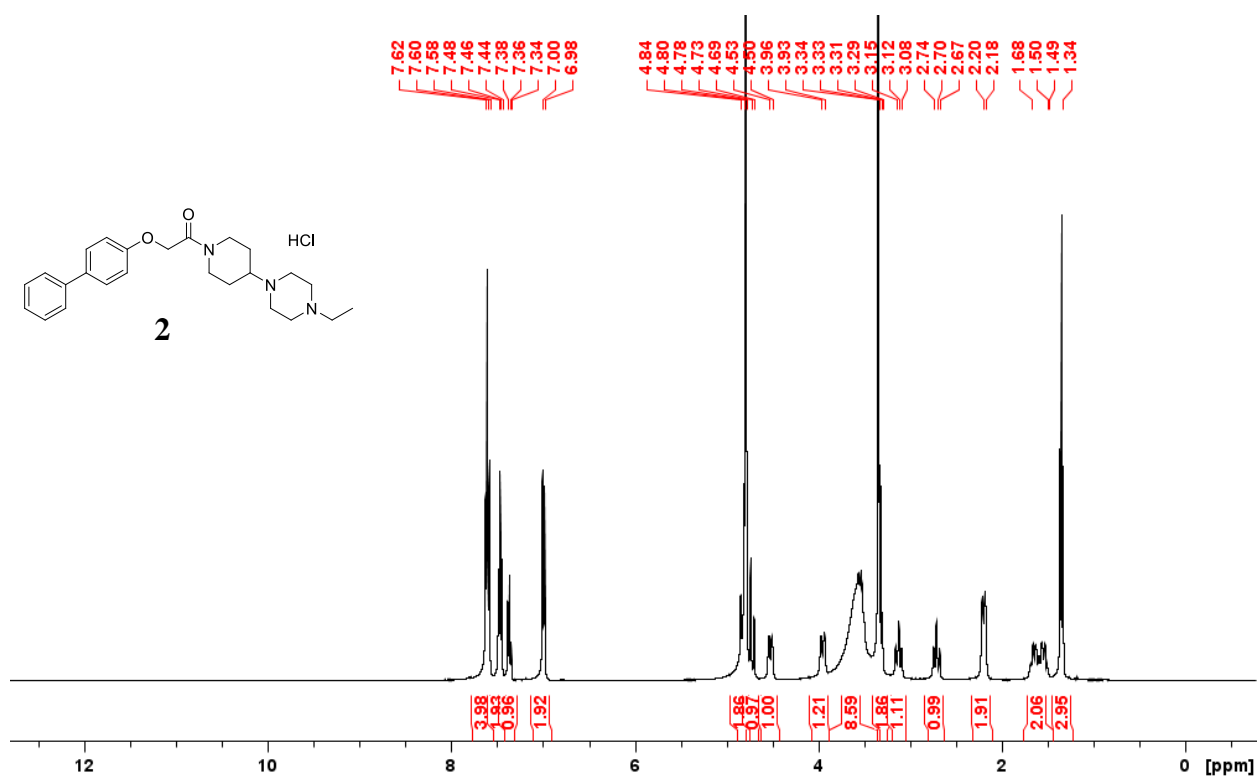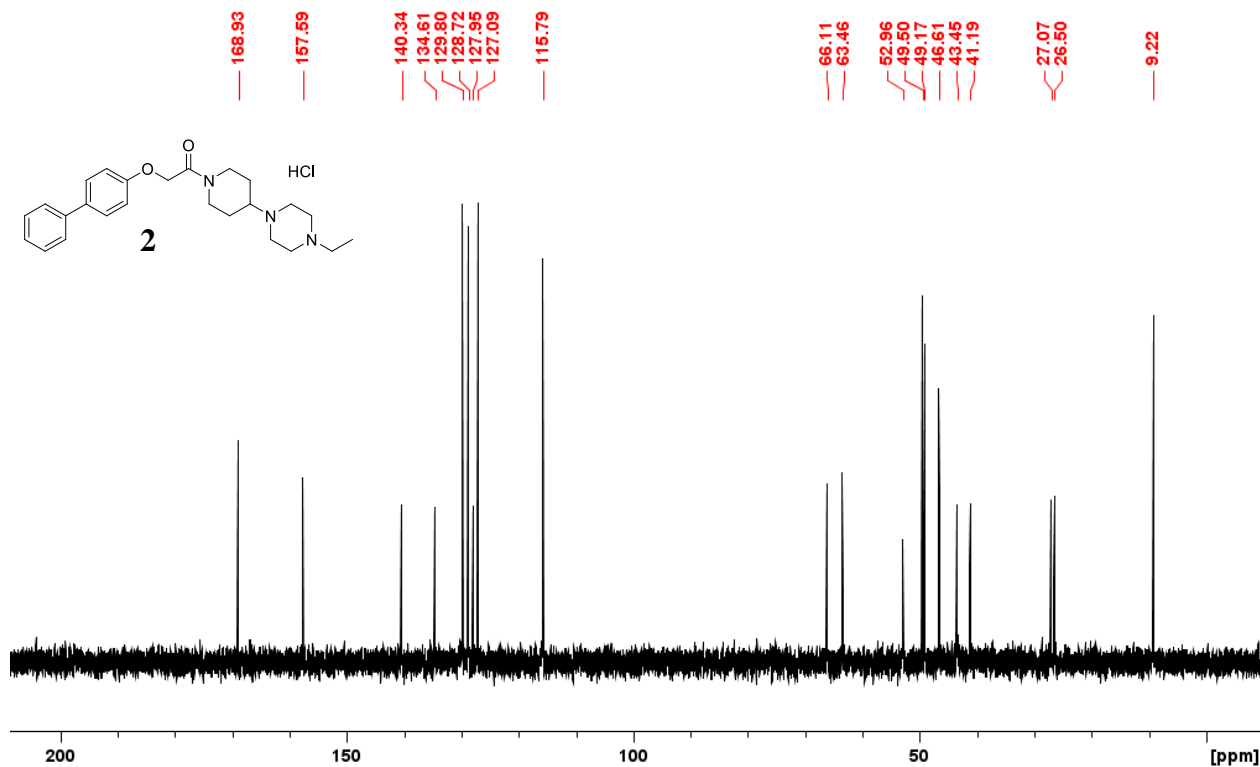

# SUPPORTING INFORMATION

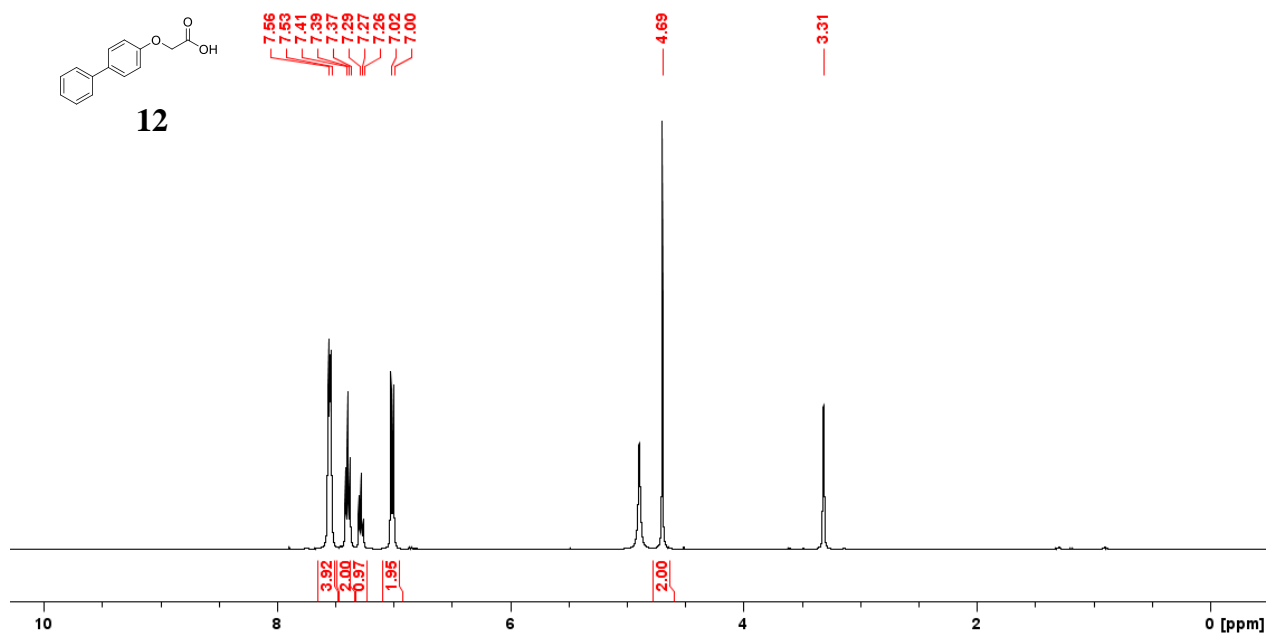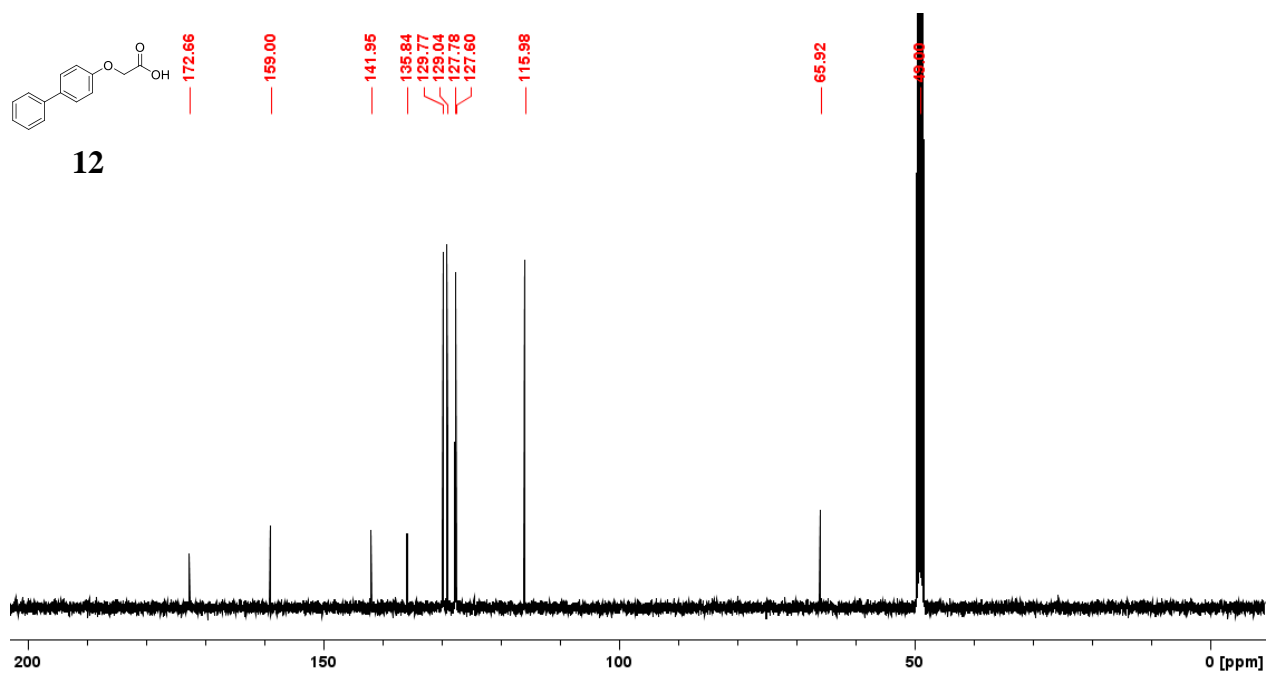

# SUPPORTING INFORMATION

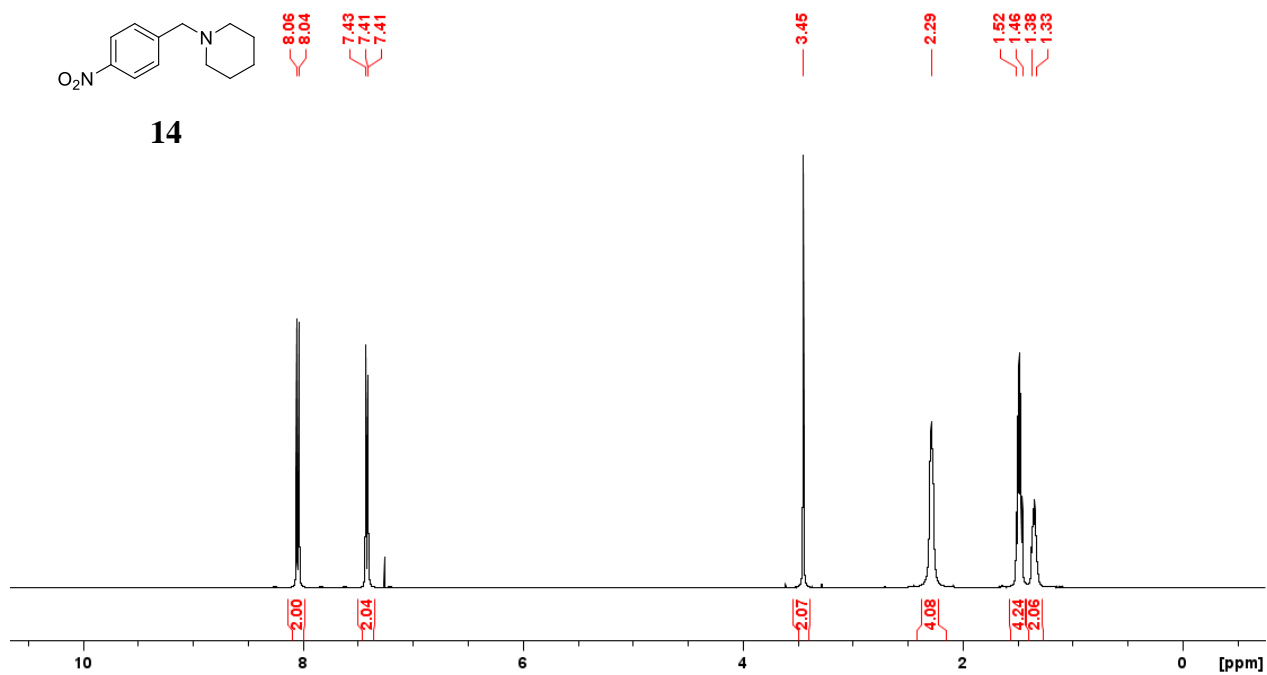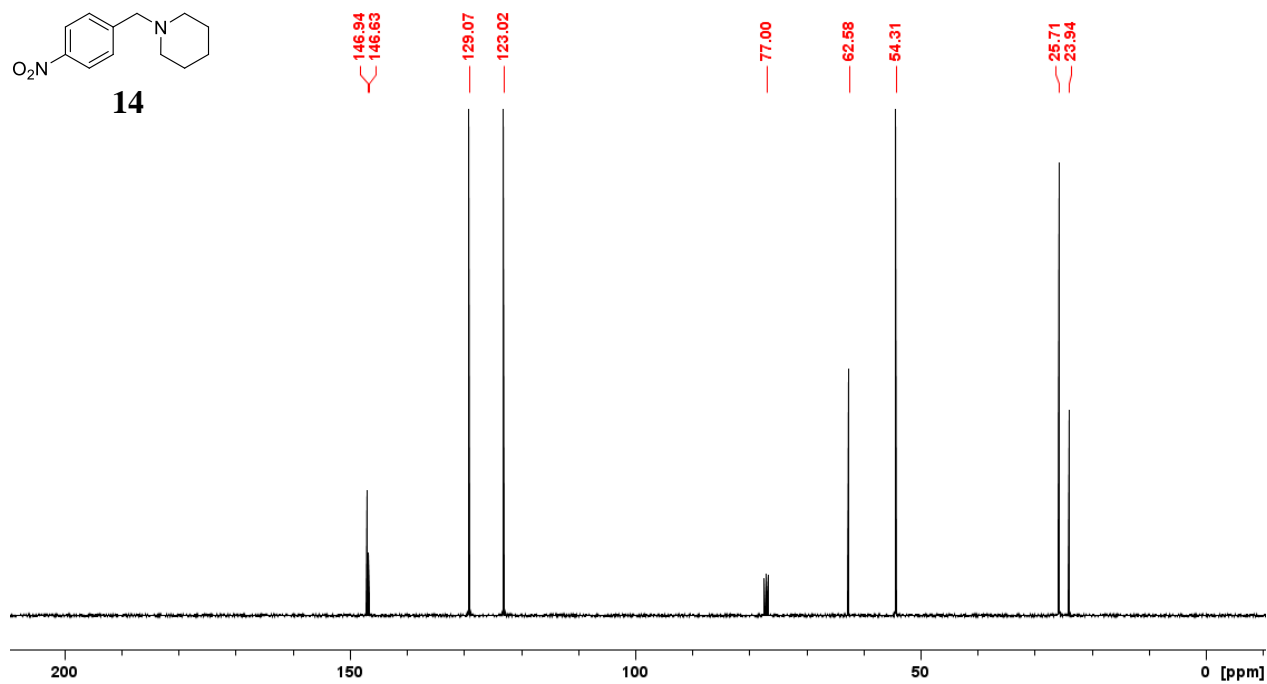

# SUPPORTING INFORMATION

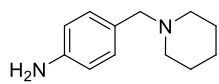

**15**

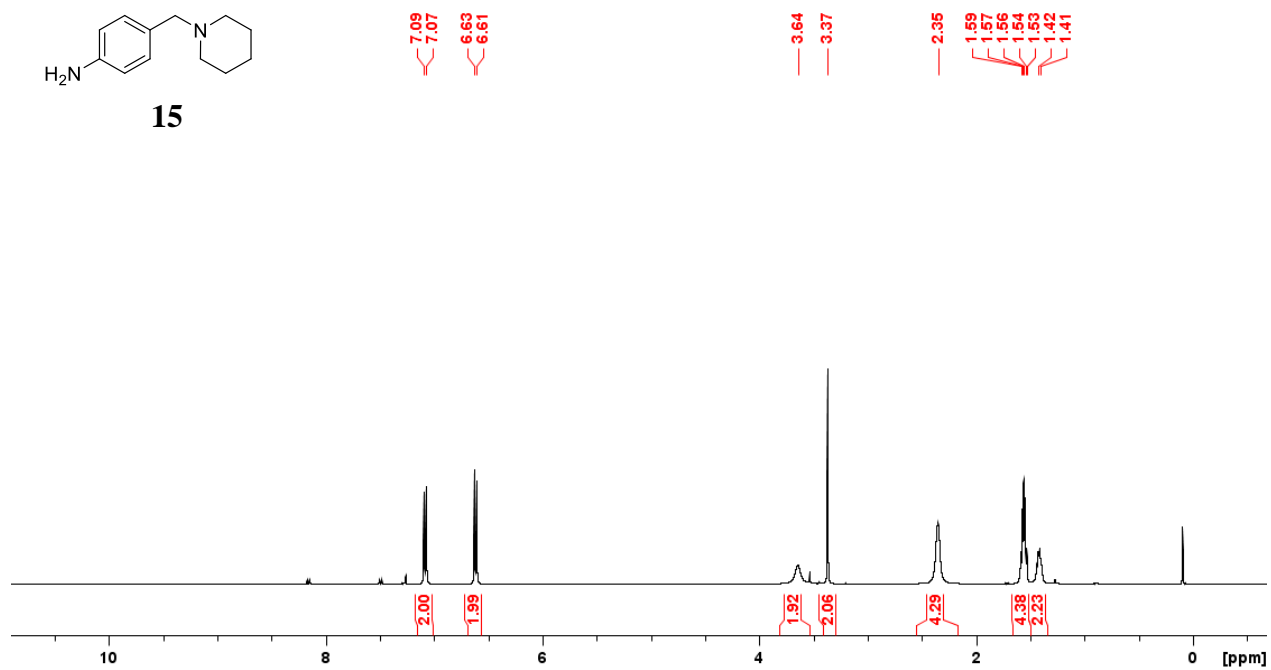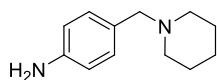

**15**

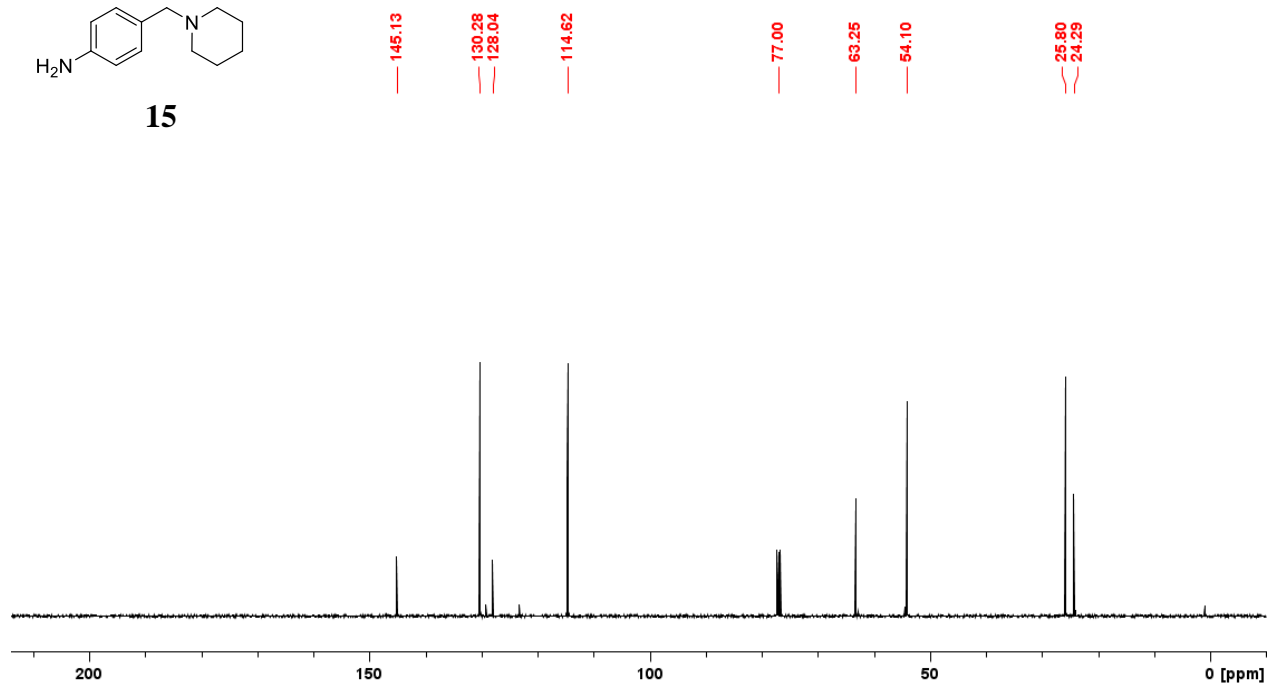



# SUPPORTING INFORMATION

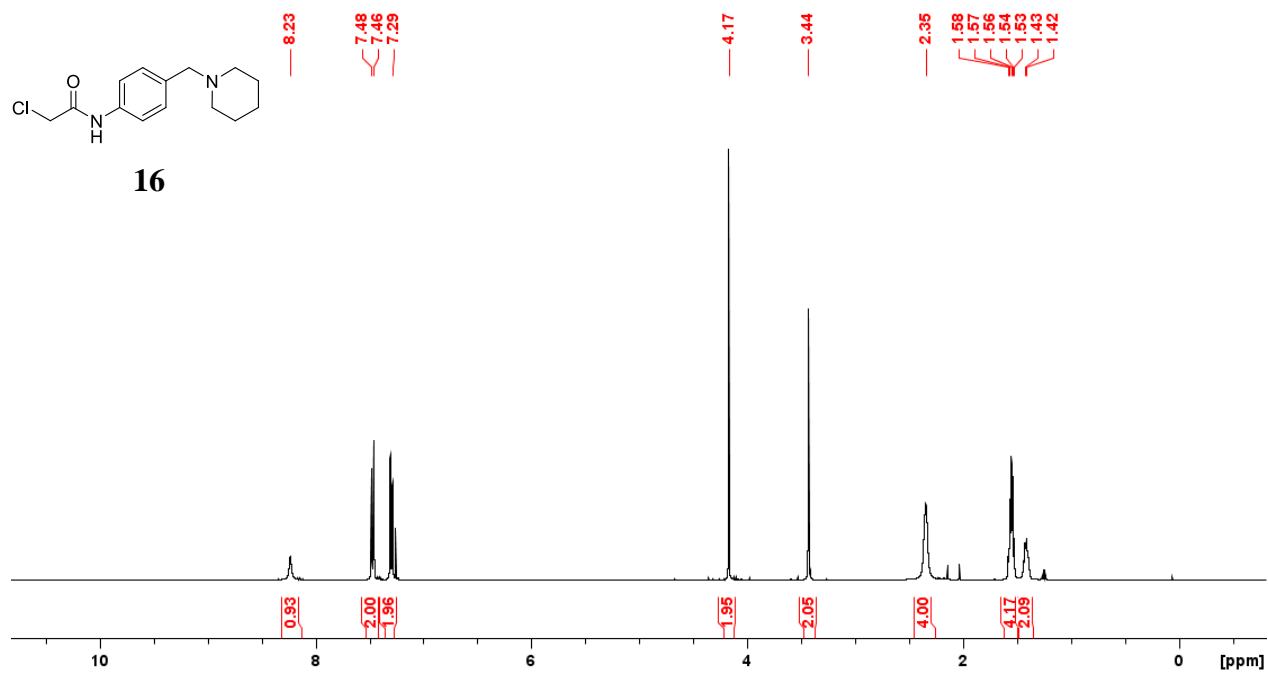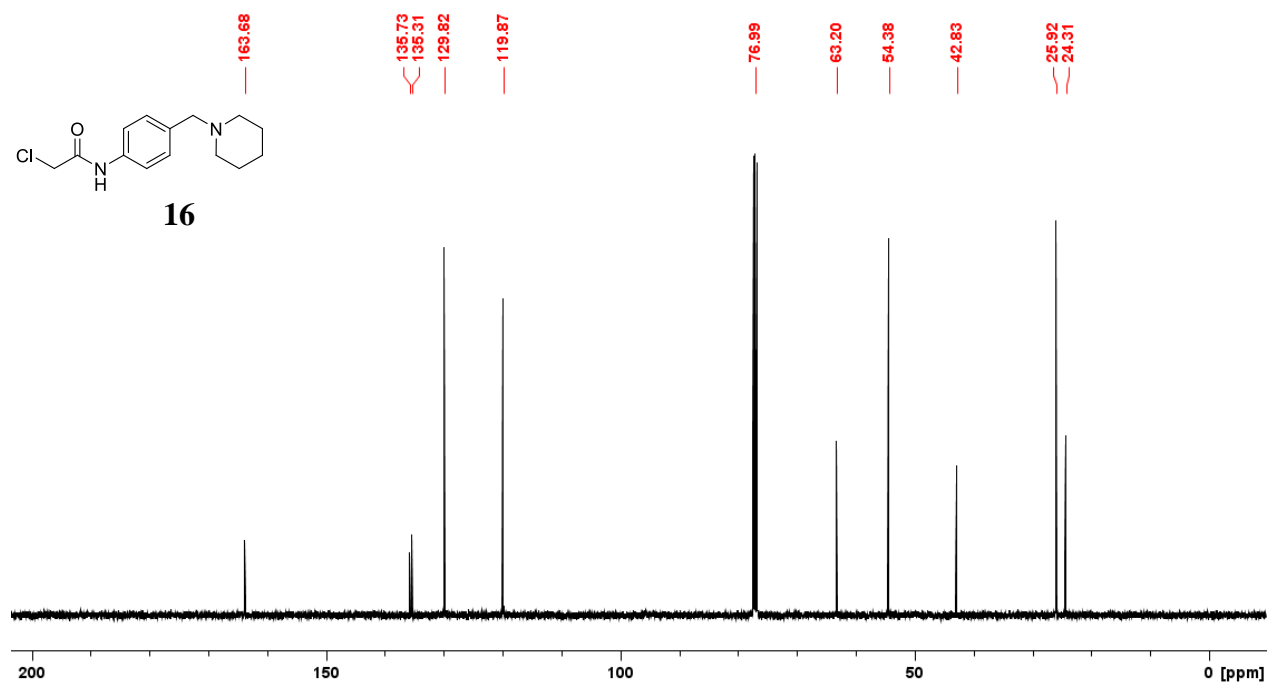

## SUPPORTING INFORMATION

### Multiple sequence alignment AgAChE1

AgAChE1 (accession no: XP\_321792; UNIPROT code: ACES\_ANOGA) after multiple alignment<sup>3-4</sup> with *Torpedo californica* (TcAChE, PDB code: 1EA5, UNIPROT code: ACES\_TORCA), *Homo sapiens* (hAChE, PDB code: 4EY4, UNIPROT code: ACES\_HUMAN), *Mus musculus* (mAChE, PDB code: 1J06, UNIPROT code: ACES\_MOUSE), and *Drosophila melanogaster* (DmAChE, PDB code: 1QO9, UNIPROT code: ACES\_DROME). Amino acids defined as ‘loop one’ and ‘loop two’ are highlighted in yellow and blue, respectively.

```

AgAChE1 DANDNDPLVVNTDKGRIRGITVDAPSGKKVDVWLGIPIYAQPPVGPLRFRHPRPAEK-WTG
hAChE   EGREDAELLVTVRGGRRLRGIRLKTGGG-PVSAFLGIPFAEPPMGPRRFLPPEP-KQPWSG
mAChE   EGREDPQLLVVRVGGQLRGIRLKAPGG-PVSAFLGIPFAEPPVGSRRFMPPEP-KRPWSG
DmAChE  VCGVIDRLVVQTS5GPPVGRSVTVQG-REVHVYTGIPYAKPPVEDLRFKRPVPAE-PWHG
TcAChE  QADDHSELLVNTKSGKVMGTRVPVLS5-HISAFLLGIPFAEPPVGNMRFRRPEP-KKPWSG

AgAChE1 VLNTTTPPN5CVQIVDTVF5GDFPGATMWNPNTP5SEDCLYINVVAPRPRPKNAA-VMLWI
hAChE   VVDATTFQ5VCYQYVDTLYPGFEGTEMWNP5NRELSEDCLYLN5VWTPYPRPTSPTPV5LVI
mAChE   VLDATTFQNV5CYQYVDTLYPGFEGTEMWNP5NRELSEDCLYLN5VWTPYPRPASPTPV5LWI
DmAChE  VLDATGLSATCVQERYEYFPGFSGEEIWNPN5TVSEDCLYIN5WAPAKNTTNGLP5ILIWI
TcAChE  VWNASTYPNN5CQYVDEQFPGF5GSEMWNPN5REMSDCLYLN5IWVSPRPKSTT-VMVWI

AgAChE1 FGGGFYSGTATLDVYDHRALAS-EENVIVVSLQYRVASLGFLFL-----GTPEAPGNA
hAChE   YGGGFYSGASSLDVYDGRFLVQAE-RTVLVSMNYRVGAFGFLALP-----GSREAPGNV
mAChE   YGGGFYSGAASLDVYDGRFLAQVEGA-VLVSMNYRVGTFGFLALP-----GSREAPGNV
DmAChE  YGGGFMTGSATLDIYNADIMAAV-GNVIVASFQYRVGAFGFLH5APEMPSEFAEEAPGNV
TcAChE  YGGGFYSG55TLDVYNGKYLAYTEE-VVLVSL5YRVGAFGFLALH-----GSQEAPGNV

AgAChE1 GLFDQNLALRWVRDNIHRFGGDP5SRVTLF5GESAGAVSV5LHLLSALS5RDLFQRAILQ5GS
hAChE   GLLDQRLALQWVQENVA5FGDPT5VT5LF5GESAGAA5VGMHLLSPP5RGLF5HRAVLQ5GA
mAChE   GLLDQRLALQWVQENIA5FGDPM5VT5LF5GESAGAA5VGMHILSLP5RSLF5HRAVLQ5GT
DmAChE  GLWDQALAIRWLKDNAHAFGGNPEWMT5LF5GESAG55SVNAQLM5PVTRGLV5KRGMMQ5GT
TcAChE  GLLDQRMALQWVHDNIQF5FGDPK5TVTIF5GESAGGA5VGMHILSPG5RDLF5RRAILQ5GS

AgAChE1 PTAPWALVSREEATLR-ALRLAEAVGCP--HEPSKLSDAVECLRGKDP-HVLVNNEWGTL
hAChE   PNGPWATVGMGEARRR-ATQLAHLVGCP5GGTGGNDTEL5VACL5RTR-PAQVLVNHEWHVL
mAChE   PNGPWATVSAGEARRR-ATLLARLVGCP5GGGAGGNDTEL5IACL5RTR-PAQDLVDHEWHVL
DmAChE  MNAPWSHMTSEKAVEIGKALINDC-NCNASMLK5TNP5AHVM5CMRSVD-AKTISVQ5QWNSY
TcAChE  PNCPWASV5VAEGRRR-AVELGRNLCN----LNSDEELIHCLREKKP-QELIDVEWNV5L

AgAChE1 G---ICEFPFVPVVDGAFLDET5PQRS5LASGRF5KTEILTGSNTEEGYF5IYY5L5TELLRK
hAChE   PQESVFRFSFVPVVDGDFLSDTPEALINAGDFHGLQVL5GVV5KDEGSYFLVY-GAPGFSK
mAChE   PQESIFRFSFVPVVDGDFLSDTPEALINTGDFQDLQVL5GVV5KDEGSYFLVY-GVPGFSK
DmAChE  S--GILSFP5APTIDGAFLPADPMTLMKTADLKDYDILMGNVRDEGT5YFLLYDFIDYFDK
TcAChE  PFDSIFRFSFVPVIDGEFFPT5LESMLNSGNF5KKTQILLGVN5KDEGSFFLLY-GAPGFSK

AgAChE1 EEGVTVTREEFLQAVRELNP5YVNGAARQAIVFEYTDWTEPDNP5NSNRDALDKMVG5DYHFT
hAChE   DNE5LISRAEFLAGVRV5GPQVSDLA5EAVVLHYTDWLHPEDPARLREALSDV5VGDHNVV
mAChE   DNE5LISRAQFLAGVRIGV5PQASDLA5EAVVLHYTDWLHPEDP5THLRDAMS5AVVGDHNVV
DmAChE  DDATALPRDKYLEIMNNIFGKATQ5AEREAII5FQYTSWEG-NPGYQ5NQ5QIGRAVGDHFF5T
TcAChE  D5ESKISRED5FMSGVKLSVP5HANDLGLDAVTLQYTDWMD5D5NNGIKNRDGLDDI5VGDHNV5I

AgAChE1 CNVNEFAQRYAEEGNNV5MYLYTHRSKGNP5WRWTGVMHGDEIN5YFGEPLNPTLGYTED
hAChE   CPVAQLAGRLAAQGARV5YAYVEHRA5TL5WPL5WMGV5PHGYEIEFIFGIPLDPSRNYTAE
mAChE   CPVAQLAGRLAAQGARV5YAYIFEHRA5TL5WPL5WMGV5PHGYEIEFIFGLPLDPSLNYTTE
DmAChE  CPTNEYAQLAERGASVH5Y5YF5THRT5T5SLWGEW5MGVLHGDEIEYFFGQPLNNSLQYRPV
TcAChE  CPLMHFVNKYTKFNGTYLYFFNH5RASNLV5PEW5MGVIHGYEIEFV5GLPLVKELNYTAE

AgAChE1 EKDFS5RKIMRYW5NFAKTGNPN5NTAS5EFPEWPKHTAHGRHYLELGL--NTSFV5GRGPR
hAChE   EKIFAQRLMRYWANFARTGDPN-EPRDPKAPQWPPYTAGAQYV5SLDL--RPLEV5RRGLR
mAChE   ERIFAQRLMKYWTNFARTGDPN-DPRDSK5PQWPPYTTAAQYV5SLNL--KPLEV5RRGLR
DmAChE  EREL5GRML5AVIEFAKTGNPAQD----GEEWP5NFSKEDPV5YIF5STD5KIEKLARGPL
TcAChE  EEALS5RRI5M5HYWATFAKTGNPN-EPH5SQ5SK-WPLFTTKEQKFIDLNT--EPMKV5HQRLR

AgAChE1 LRQCAF5WK5YLPQLVAAT
hAChE   AQACAF5WNRFLPKLLSAT
mAChE   AQTCAF5WNRFLPKLLSAT
DmAChE  AARCSF5WNDYLPKVR5WA
TcAChE  VQMCV5FWNQFLPKLLNAT

```

## SUPPORTING INFORMATION

### Multiple sequence alignment AaAChE1

AaAChE1 (accession no: ABN09910) after multiple alignment<sup>3-4</sup> with *Torpedo californica* (TcAChE, PDB code: 1EA5, UNIPROT code: ACES\_TORCA), *Homo sapiens* (hAChE, PDB code: 4EY4, UNIPROT code: ACES\_HUMAN), *Mus musculus* (mAChE, PDB code: 1J06, UNIPROT code: ACES\_MOUSE), and *Drosophila melanogaster* (DmAChE, PDB code: 1QO9, UNIPROT code: ACES\_DROME). Amino acids defined as ‘loop one’ and ‘loop two’ are highlighted in yellow and blue, respectively.

```

AaAChE1 DGTDNDPLLITTDKGVRLTLEAPSGKKVDLWLGIPYAQPPLGPLRFRHPRPVEK-WTG
hAChE   EGREDAELLVTVRGGRRLRGIRLKTGGG-PVSAFLGIPFAEPPMGPRRFLPPEP-KQPWSG
mAChE   EGREDPQLLVVRVGGQLRGIRLKAPGG-PVSAFLGIPFAEPPVGSRRFMPPEP-KRPWSG
DmAChE  VCGVIDRLVVQTS5GPVGRSVTVQG-REVHVYTGIPYAKPPVEDLRFKRPVPAE-PWHG
TcAChE  QADDHSELLVNTKSGKVMGTRVPVLS-HISAFLGIPFAEPPVGNMRRRPEP-KKPWSG

AaAChE1 VLNATTPPN5CVQIVDTVFGDFPGATMWNPNTPLESDCLYINVVVPHPRPKNSA-VMLWI
hAChE   VVDATTFQ5VCYQYVDTLYPGFEGTEMWNP5NRELESDCLYLNWVTPYPRPTSPTPLVWI
mAChE   VLDATTFQNVVCYQYVDTLYPGFEGTEMWNP5NRELESDCLYLNWVTPYPRPASPTPLVWI
DmAChE  VLDATGLSATCVQERYEYFPGFSGEEIWNPN5NRELESDCLYINWVAPAKNTTNGLPILWI
TcAChE  VWNASTYPNNCQYVDEQFPGFSGSEMWNPN5NRELESDCLYLNWVSPRPKSTT-VMVWI

AaAChE1 FGGGFYSGTATLDVYDHRRLAS-EENVIVVSLQYRVASLGFLFL-----GTPEAPGNA
hAChE   YGGGFYSGASSLDVYDGRFLVQAE-RTVLVSMNYRVGAFGFLALP-----GSREAPGNV
mAChE   YGGGFYSGAASLDVYDGRFLAQVEGA-VLVSMNYRVGTFGFLALP-----GSREAPGNV
DmAChE  YGGGFMTGSATLDIYNADIMAAV-GNVIVASFQYRVGAFGFLHLAPEMPSEFAEEAPGNV
TcAChE  YGGGFYSGS5TLDVYNGKYLAYTEE-VVLVSLSYRVGAFGFLALH-----GSQEAPGNV

AaAChE1 GLFDQNLALRWVRDNIHKFGGDP5SRVTLFGE5AGAVSVSLHLLSALSRLDFQRAILQ5GS
hAChE   GLLDQRLALQWVQENVA5FGDPT5VTFLFGE5AGAA5VGMHLLSPPSRGLFHRAVLQ5GA
mAChE   GLLDQRLALQWVQENIA5FGDPM5VTFLFGE5AGAA5VGMHILSLPSRSLFHRAVLQ5GT
DmAChE  GLWDQALAIRWLKDNAHAFGGNPEWMTL5FGE5AGSS5VNAQLMSPVTRGLVKRGMMQ5GT
TcAChE  GLLDQRMALQWVHDNIQFFGGDPKTVTIFGE5AGGASVGMHILSPGSRDLFRRAILQ5GS

AaAChE1 PTAPWALVSREEATLR-ALRLAEAVNCP--HDAKTLTDTVECLRTKDP-NVLVDNEWGTL
hAChE   PNGPWATVGMGEARRR-ATQLAHLVGCP5GGTGGNDTELVACLRTR-PAQVLVNHEWHVL
mAChE   PNGPWATVSAGEARRR-ATLLARLVGCP5GGAGGNDTELIACLRTR-PAQDLVDHEWHVL
DmAChE  MNAPWSHMTSEKAVEIGKALINDC-NCNASMLKTNPAHVMSCMR5VD-AKTISVQQWNSY
TcAChE  PNCPWASV5VAEGRRR-AVELGRNLNCN----LNSDEELIHCLREKKP-QELIDVEWNVL

AaAChE1 G---ICEFPFVPVVDGAFLDET5PQRS5LASGRF5KKT5DILTGSNTEEGYFIIYVLT5ELLRK
hAChE   PQESVFRFSFVPVVDGDFLSDTPEALINAGDFHGLQVLVG5VKDEGSYFLVY-GAPGFSK
mAChE   PQESIFRFSFVPVVDGDFLSDTPEALINTGDFQDLQVLVG5VKDEGSYFLVY-GVPGFSK
DmAChE  S--GILSF5PSAPTIDGAFLPADPMTLMKTADLKDYDILMGNVRDEGTYFLLYDFIDYFDK
TcAChE  PFDSIFRFSFVPVIDGEFFPT5LESMLNSGNF5KKTQILLGVNKDEGSFFLLY-GAPGFSK

AaAChE1 EEGVTVSREEFLQAVRELNP5YVNGAARQAIVFEYTDWTEPNPN5NRDALDKMVG5DYHFT
hAChE   DNE5LISRAEFLAGVRVGPVQ5SDLA5EAVVLHYTDWLHPEDPARLREALSDVVG5DHN5V
mAChE   DNE5LISRAQFLAGVRIGVPQASDLA5EAVVLHYTDWLHPEDP5THLRDAMS5AVVG5DHN5V
DmAChE  DDATALPRDKYLEIMNNIFGKATQAE5EAIIFQYTSWEG-NPGYQ5NQ5QIGRAVGD5HFFT
TcAChE  D5ESKISRED5FMSGVKLSVPHANDLGLDAVTLQYTDWMDNNGIKNRDGLDDIVGD5HN5V

AaAChE1 CNVNEFAQRYAEEGN5V5MYLYTHRSKGNP5WRWTGVMHGDEIN5VFGEPLNSDLGYMED
hAChE   CPVAQLAGRLAAQGARV5AYVFEHRA5TL5WPLWMGVPHGYEIEFIFGIPLDPSRNYTAE
mAChE   CPVAQLAGRLAAQGARV5AYIFEHRA5TL5WPLWMGVPHGYEIEFIFGLPLDPSLNYTTE
DmAChE  CPTNEYAQLAERGASVH5Y5YFTHRT5TSLWGEWMGVLHGDEIEYFFGQPLNNSLQYRPV
TcAChE  CPLMHFVNKYTKFNGTYLYFFNH5RASNLV5PEWMGVIHG5EIEFV5GLPLVKELNYTAE

AaAChE1 EKDFS5RKIMRYW5NFAKTGNPN5PPN5DFPEWPKHTAHGRHYLELGL--NTTYVGRGPR
hAChE   EKIFAQRLMRYWANFARTGDPN-EPRDPKAPQWPPYTAGAQYV5SLDL--RPLEVRRGLR
mAChE   ERIFAQRLMKYWTNFARTGDPN-DPRDSKSPQWPPYTTAAQYV5SLNL--KPLEVRRGLR
DmAChE  EREL5GRMLSAVIEFAKTGNPAQD----GEEWP5NFSKEDPV5YIFSTDDKIEKLARGPL
TcAChE  EEALSRRIMHYWATFAKTGNPN-EPH5Q5ESK-WPLFTTKEQKFIDLNT--EPMKVHQRLR

AaAChE1 LRQCAF5WK5YLPQLVAAT
hAChE   AQACAF5WNRFLPKLLSAT
mAChE   AQTCAF5WNRFLPKLLSAT
DmAChE  AARCSF5W5NDYLPK5VRSWA
TcAChE  VQMCV5FWNQFLPKLLNAT

```

## Selection of template for homology modeling

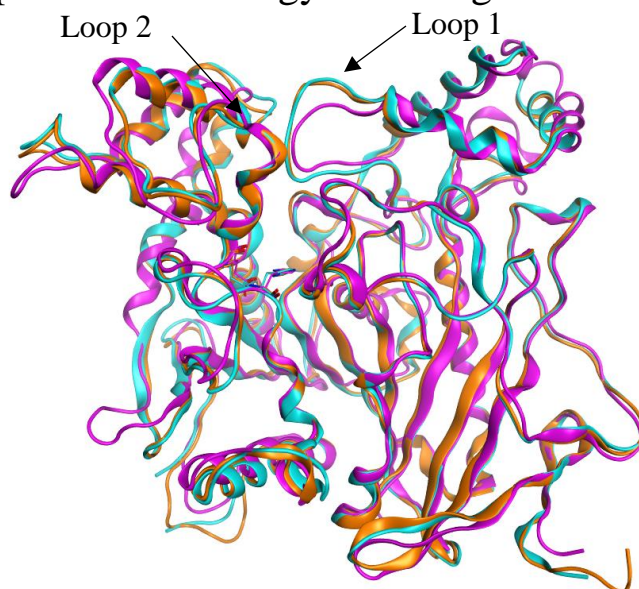

**Figure S20.** Superposition of *mAChE* (pdb code 5FOQ<sup>5</sup>; ribbon in orange), *hAChE* (pdb code 4EY4<sup>6</sup>; ribbon in cyan), or *DmAChE* (pdb code 1DX4<sup>7</sup>; ribbon in magenta). The side chains of the amino acids in the catalytic triad are shown as sticks. AChE from three species were considered as template for the homology modeling, *mAChE*, *hAChE*, or *DmAChE*. After the multiple alignments, the identity of the possible templates *mAChE*, *hAChE*, and *DmAChE* and the sequences to be modelled were 48%, 48%, and 39% for *AgAChE1*, respectively, and 48%, 48%, and 38% for *AaAChE1*, respectively based on residues 1-543 in *hAChE*. One crystal structure from each species were superposed and visually analyzed. The analysis showed that both the general fold and the amino acids lining the active site are highly conserved among the different species. It could however be seen that the two loops at the entrance of the active site differs between *DmAChE* and the vertebrate AChEs. In more details, ‘loop 1’ is one residue longer and ‘loop 2’ is two residues shorter. The multiple sequence alignment showed that for *AgAChE1* and *AaAChE1* ‘loop 2’ contains the same number of residues as *DmAChE*, but that ‘loop 1’ is one residue shorter (i.e. three residues shorter than vertebrate AChE). Although showing a lower sequence identity, *DmAChE* (pdb 1DX4<sup>7</sup>) was selected as the main template, due to the higher similarity of ‘loop 1’ and ‘loop 2’. This template was used to model all residues with the exception of three loops: 102-112, 487-499, and 512-520 (*hAChE* numbering). It was found that in 1DX4 these loops were either not modelled or that their lengths differed from *AgAChE1* and *AaAChE1*, resulting in *mAChE* (pdb code 5FOQ)<sup>5</sup> being considered as a more suitable template for modelling of these residues.

## Angles of Tyr337 in homology models of AgAChE1 and AaAChE1

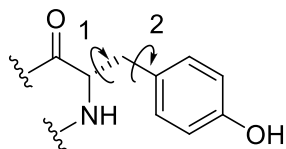

**Figure S21.**  $\chi_1$  ( $C_\alpha$ - $C_\beta$ ) and  $\chi_2$  ( $C_\beta$   $C_1$ ) dihedral angles for the side chain of Tyr337 (*hAChE* numbering) were adjusted to -157.0 and -157.1 degrees and  $\chi_2$  ( $C_\beta$   $C_1$ ) -26.4 and -26.3 degrees for AgAChE1 and AaAChE1, respectively. These angles resemble those in **2•mAChE** and have been observed in previously reported protein-ligand complexes of *mAChE* and *hAChE* (for examples see complexes with pdb codes 4ARB<sup>8</sup> and 4EY7<sup>6</sup>).

## Evaluation of AgAChE1 and AaAChE1 homology models

**Table S9.** Statistics of the stereochemical quality of the generated homology models according to PROCHECK.<sup>9</sup>

| Ramachandran plot no. of residues (%) | AgAChE1    | AaAChE1    |
|---------------------------------------|------------|------------|
| Most favoured regions                 | 364 (81.3) | 368 (81.8) |
| Additional allowed regions            | 73 (16.3)  | 73 (16.2)  |
| Generously allowed regions            | 7 (1.6)    | 4 (0.9)    |
| Residues in disallowed regions        | 4 (0.9)    | 5 (1.1)    |



Compounds **1** and **2** modelled into the active site of AgAChE1 and AaAChE1.

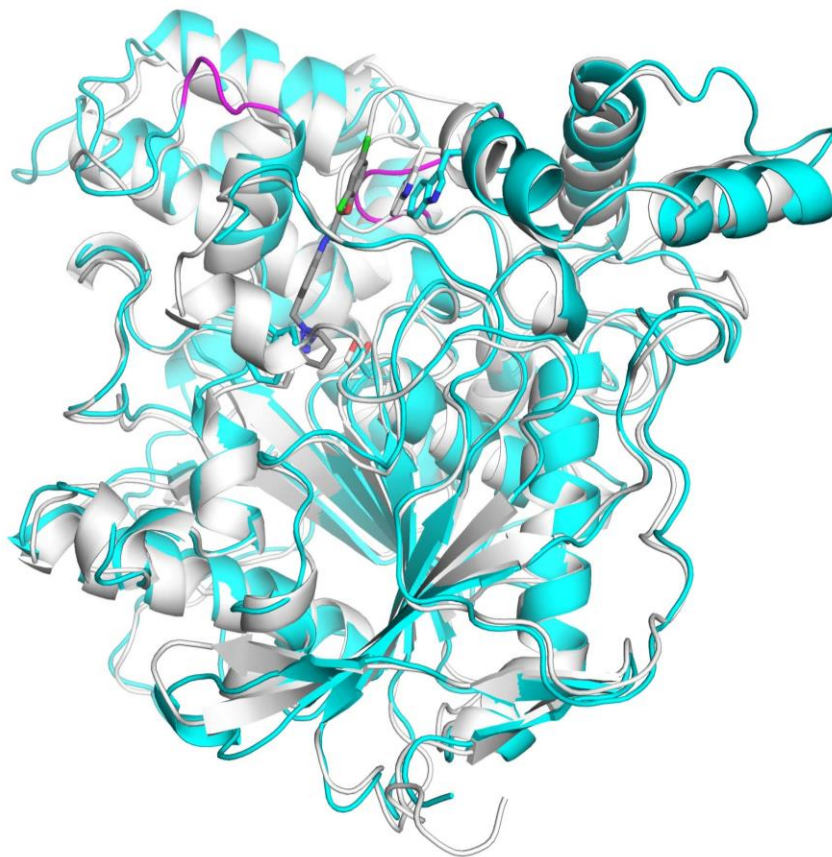

**Figure S22.** Superposition of the homology model of AgAChE1 (cyan ribbon) and *m*AChE (gray ribbon) in complex with **1** (dark gray). The differing loops (loop 1 and loop 2) at the entrance of the gorge of AgAChE1 are marked in magenta.

# SUPPORTING INFORMATION

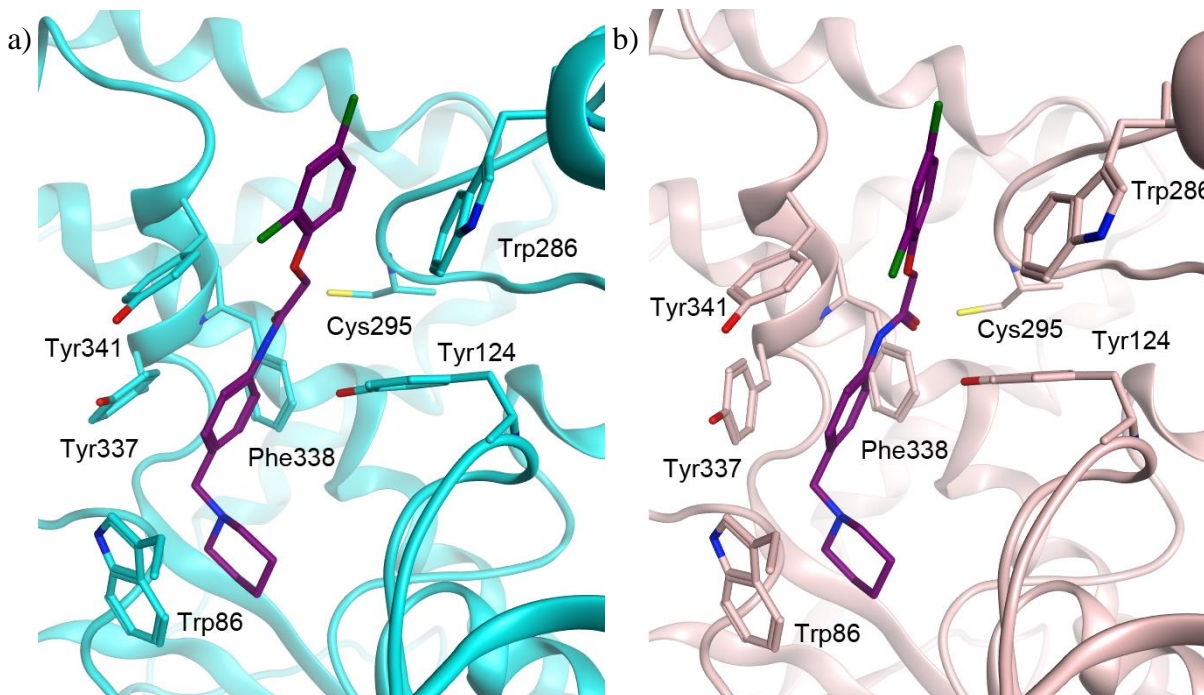

**Figure S23.** Homology model of AgAChE1 in cyan (a) and AaAChE1 in pink (b) showing a close up of active site with **1** (purple) modelled with the positively charged piperidine projecting down into the catalytic site (based on **1**•mAChE).

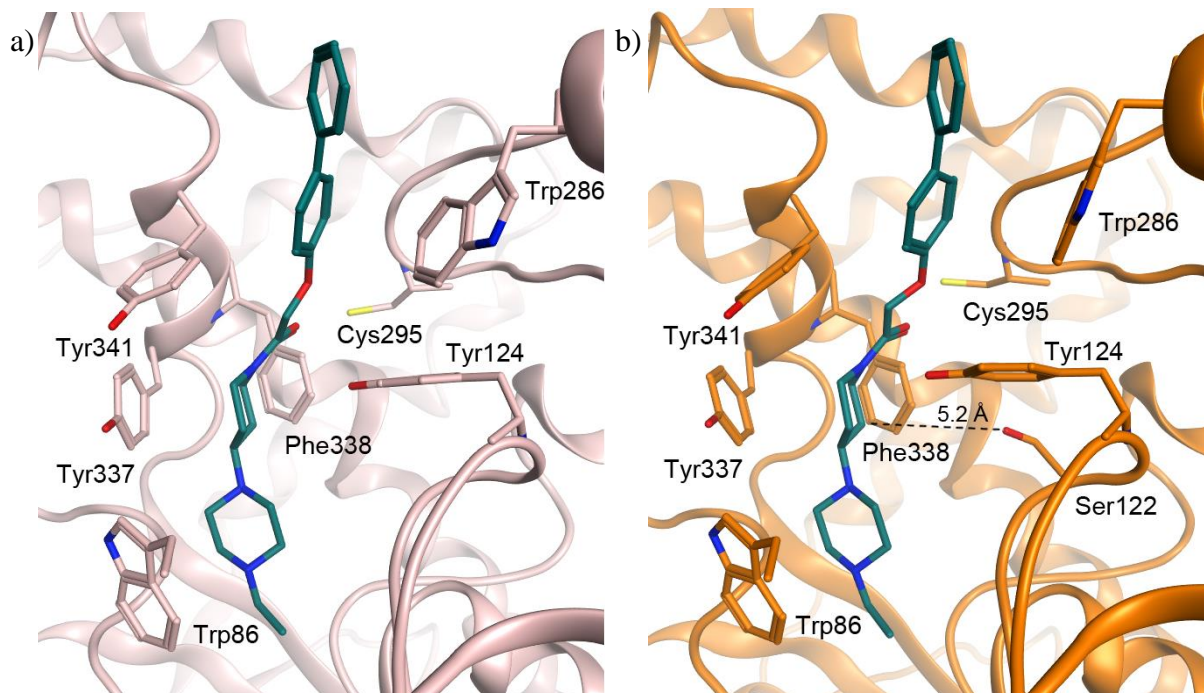

**Figure S24.** Homology models of AaAChE1 in pink (a) and of G122S-AgAChE1 in orange (b) showing a close up of active site with **2** (green) modelled with the positively charged piperazine projecting down into the catalytic site (based on **2** aligned on **1**•mAChE).

## Data collection and refinement statistics for 5FUM

**Table S10.** Data collection and refinement statistics for 5FUM. Statistics for the highest-resolution shell are shown in parentheses.

|                                    |                          |
|------------------------------------|--------------------------|
| pdb entry code                     | 5FUM                     |
| Resolution range (Å)               | 29.08 - 2.5 (2.59 - 2.5) |
| Space group                        | P 21 21 21               |
| Unit cell (Å)                      | 78.7 × 110.8 × 227.6     |
| Total reflections                  | 520714 (51599)           |
| Unique reflections                 | 69320 (6799)             |
| Multiplicity                       | 7.5 (7.6)                |
| Completeness (%)                   | 99.60 (99.28)            |
| Mean I/sigma(I)                    | 14.69 (2.35)             |
| Wilson B-factor (Å <sup>2</sup> )  | 51.2                     |
| R-merge                            | 0.124 (1.584)            |
| R-meas                             | 0.1333 (0.724)           |
| CC1/2                              | 0.998 (0.885)            |
| CC*                                | 0.999 (0.969)            |
| R-work                             | 0.196 (0.3103)           |
| R-free                             | 0.227 (0.3888)           |
| Number of non-hydrogen atoms       | 8602                     |
| macromolecules                     | 8350                     |
| ligands <sup>a</sup>               | 123                      |
| water                              | 129                      |
| Protein residues                   | 1068                     |
| RMSD from ideal values             |                          |
| bond lengths (Å)                   | 0.004                    |
| bond angles (°)                    | 0.89                     |
| Ramachandran favored (%)           | 95                       |
| Ramachandran outliers (%)          | 0.28                     |
| Clashscore                         | 0.72                     |
| Average B-factor (Å <sup>2</sup> ) | 62.00                    |
| macromolecules                     | 61.60                    |
| ligands                            | 87.50                    |
| solvent                            | 58.90                    |

<sup>a</sup>These include compound **2** (modelled in both the A and the B chain) and fragments of six PEG750MME molecules modelled in the structure.



## References

1. Berg, L.; Andersson, C. D.; Artursson, E.; Hörnberg, A.; Tunemalm, A.-K.; Linusson, A.; Ekström, F. Targeting acetylcholinesterase: Identification of chemical leads by high throughput screening, structure determination and molecular modeling. *PLoS One* **2011**, *6*, e26039.
2. SIMCA-P+, version 13.0.3; Umetrics AB: Box 7960, Umeå, Sweden, 2013.
3. *Molecular Operating Environment (MOE)*, version 2012.10; Chemical Computing Group Inc.: 1010 Sherbooke St. West, Suite #910, Montreal, QC, Canada, H3A 2R7, 2012.
4. Larkin, M. A.; Blackshields, G.; Brown, N. P.; Chenna, R.; McGettigan, P. A.; McWilliam, H.; Valentin, F.; Wallace, I. M.; Wilm, A.; Lopez, R.; Thompson, J. D.; Gibson, T. J.; Higgins, D. G. Clustal W and Clustal X version 2.0. *Bioinformatics* **2007**, *23*, 2947-2948.
5. Berg, L.; Mishra, B. K.; Andersson, C. D.; Ekström, F.; Linusson, A. The nature of activated non-classical hydrogen bonds: A case study on acetylcholinesterase-ligand complexes. *Chemistry* **2016**, *22*, 2672-2681.
6. Cheung, J.; Rudolph, M. J.; Burshteyn, F.; Cassidy, M. S.; Gary, E. N.; Love, J.; Franklin, M. C.; Height, J. J. Structures of human acetylcholinesterase in complex with pharmacologically important ligands. *J. Med. Chem.* **2012**, *55*, 10282-10286.
7. Harel, M.; Kryger, G.; Rosenberry, T. L.; Mallender, W. D.; Lewis, T.; Fletcher, R. J.; Guss, J. M.; Silman, I.; Sussman, J. L. Three-dimensional structures of *Drosophila melanogaster* acetylcholinesterase and of its complexes with two potent inhibitors. *Protein Sci.* **2000**, *9*, 1063-1072.
8. Berg, L.; Niemiec, M. S.; Qian, W.; Andersson, C. D.; Wittung-Stafshede, P.; Ekström, F.; Linusson, A. Similar but different: thermodynamic and structural characterization of a pair of enantiomers binding to acetylcholinesterase. *Angew. Chem., Int. Ed.* **2012**, *51*, 12716-12720.
9. Laskowski, R. A.; Macarthur, M. W.; Moss, D. S.; Thornton, J. M. PROCHECK: A program to check the stereochemical quality of protein structures. *J. Appl. Crystallogr.* **1993**, *26*, 283-291.
